# Supplementary material for: Protocol for a mixed-methods feasibility study for the surviving opioid overdose with naloxone education and resuscitation (SOONER) randomised control trial
Source: PubMed Central journal article supplement — BMJ Open. 2019 Nov 12;9(11):e029436. doi: 10.1136/bmjopen-2019-029436 (PMC6858090; doi:10.1136/bmjopen-2019-029436), 2019-11-12
Supplement: bmjopen-2019-029436.draft_revisions.pdf [file bmjopen-2019-029436.draft_revisions.pdf]

# BMJ Open

BMJ Open is committed to open peer review. As part of this commitment we make the peer review history of every article we publish publicly available.

When an article is published we post the peer reviewers' comments and the authors' responses online. We also post the versions of the paper that were used during peer review. These are the versions that the peer review comments apply to.

The versions of the paper that follow are the versions that were submitted during the peer review process. They are not the versions of record or the final published versions. They should not be cited or distributed as the published version of this manuscript.

BMJ Open is an open access journal and the full, final, typeset and author-corrected version of record of the manuscript is available on our site with no access controls, subscription charges or pay-per-view fees (<http://bmjopen.bmj.com>).

If you have any questions on BMJ Open's open peer review process please email [info.bmjopen@bmj.com](mailto:info.bmjopen@bmj.com)

# BMJ Open

## Protocol for a Mixed Methods Feasibility Study for the Surviving Opioid Overdose with Naloxone Education and Resuscitation (SOONER) Randomized Control Trial

|                               |                                                                                                                                                                                                                                                                                                                                                                                                                                                                                                                                                                                                                                                                                                                                                                                                                                                                                                                                                                                                                                                                                                  |
|-------------------------------|--------------------------------------------------------------------------------------------------------------------------------------------------------------------------------------------------------------------------------------------------------------------------------------------------------------------------------------------------------------------------------------------------------------------------------------------------------------------------------------------------------------------------------------------------------------------------------------------------------------------------------------------------------------------------------------------------------------------------------------------------------------------------------------------------------------------------------------------------------------------------------------------------------------------------------------------------------------------------------------------------------------------------------------------------------------------------------------------------|
| Journal:                      | <i>BMJ Open</i>                                                                                                                                                                                                                                                                                                                                                                                                                                                                                                                                                                                                                                                                                                                                                                                                                                                                                                                                                                                                                                                                                  |
| Manuscript ID                 | bmjopen-2019-029436                                                                                                                                                                                                                                                                                                                                                                                                                                                                                                                                                                                                                                                                                                                                                                                                                                                                                                                                                                                                                                                                              |
| Article Type:                 | Protocol                                                                                                                                                                                                                                                                                                                                                                                                                                                                                                                                                                                                                                                                                                                                                                                                                                                                                                                                                                                                                                                                                         |
| Date Submitted by the Author: | 25-Jan-2019                                                                                                                                                                                                                                                                                                                                                                                                                                                                                                                                                                                                                                                                                                                                                                                                                                                                                                                                                                                                                                                                                      |
| Complete List of Authors:     | Orkin, Aaron; University of Toronto, Department of Family & Community Medicine; schwartz/reisman emergency medicine institute, Campbell, Douglas; St. Michael's Hospital, Allan Waters Family Simulation Centre; University of Toronto, Pediatrics<br>Handford, Curtis; St Michael's Hospital Toronto<br>Hopkins, Shaun; Toronto Public Health<br>Klaiman, Michelle; St. Michael's Hospital<br>Leece, Pamela; Public Health Ontario<br>Parsons, Janet; St. Michael's Hospital, Applied Health Research Centre, Li Ka Shing Knowledge Institute; University of Toronto, Dept. of Physical Therapy<br>Shahin, Rita; Toronto Public Health<br>Strike, Carol; University of Toronto, Dalla Lana School of Public Health<br>Thorpe, Kevin; St. Michael's Hospital, Applied Health Research Centre<br>Sellen, Katherine; OCAD University<br>Milos, Geoffrey<br>Wright, Amy; Toronto Public Health<br>Charles, Mercy; St. Michael's Hospital, Allan Waters Family Simulation Centre<br>Sniderman, Ruby; St. Michael's Hospital, Allan Waters Family Simulation Centre<br>Morrison, Laurie; St Michael's |
| Keywords:                     | Feasibility study, Trial Protocol, Opioid Overdose, recruitment and retention, Overdose education and naloxone distribution                                                                                                                                                                                                                                                                                                                                                                                                                                                                                                                                                                                                                                                                                                                                                                                                                                                                                                                                                                      |
|                               |                                                                                                                                                                                                                                                                                                                                                                                                                                                                                                                                                                                                                                                                                                                                                                                                                                                                                                                                                                                                                                                                                                  |

SCHOLARONE™  
Manuscripts

Title: Protocol for a Mixed Methods Feasibility Study for the Surviving Opioid Overdose with Naloxone Education and Resuscitation (SOONER) Randomized Control Trial

Running Head: SOONER Feasibility Study Protocol

Authorship table:

| Name             | Postnominals  | Affiliations                                                                  |
|------------------|---------------|-------------------------------------------------------------------------------|
| Aaron Orkin      | MD, MSc, MPH  | St. Michael's Hospital, Mount Sinai Hospital, University of Toronto           |
| Douglas Campbell | MD, MSc       | St. Michael's Hospital                                                        |
| Curtis Handford  | MD, MHSc      | St. Michael's Hospital                                                        |
| Shaun Hopkins    | BSW           | Toronto Public Health                                                         |
| Michelle Klaiman | MD            | St. Michael's Hospital                                                        |
| Pamela Leece     | MD, MSc       | Public Health Ontario                                                         |
| Janet Parsons    | BScPT MSc PhD | St. Michael's Hospital, University of Toronto                                 |
| Rita Shahin      | MD, MHSc      | Toronto Public Health                                                         |
| Carol Strike     | PhD, MSc      | University of Toronto, St. Michael's Hospital                                 |
| Kevin Thorpe     | MMath         | University of Toronto, Applied Health Research Centre, St. Michael's Hospital |
| Kate Sellen      | PhD, MDes     | OCAD University                                                               |
| Geoffrey Milos   |               | Community Advisory                                                            |
| Amy Wright       |               | Community Advisory                                                            |
| Mercy Charles    | BSc, CCRP     | St. Michael's Hospital                                                        |
| Ruby Sniderman   | MPH           | St. Michael's Hospital                                                        |
| Laurie Morrison  | MD, MSc       | St. Michael's Hospital                                                        |

Corresponding author and contact information:

Aaron Orkin t: 647-923-7551 e: [aaron.orkin@mail.utoronto.ca](mailto:aaron.orkin@mail.utoronto.ca)

Word Count:

Keywords: Feasibility study, Randomized control trial, Trial protocol, Design for health, Recruitment, Retention, Harm reduction, Opioid overdose, Overdose education, Naloxone distribution, Addiction medicine, Family medicine, Emergency medicine

Funding: This project was funded by a project grant from the Canadian Institutes of Health Research (CIHR) grant #148817. The Canadian Centre on Substance Use and Addiction (CCSA) also contributed to project workshops and community engagement.

Conflict of Interest Statement:

**Aaron Orkin:** Evidence reviewer for ILCOR 2015, and writer for AHA/HSFC Guidelines on CPR and Resuscitation in 2015. Receives salary support from the Canadian Institutes of Health Research, the Schwartz/Reisman Emergency Medicine Institute, and the University of Toronto

1  
2  
3 Department of Family and Community Medicine. AMO is an evidence reviewer for the  
4 International Liaison Committee on Resuscitation and a co-author for the 2015 American Heart  
5 Association Guidelines for CPR and ECC concerning opioid overdose and 2019 American Heart  
6 Association Guidelines updates on First Aid.

7  
8 **Douglas Campbell:** No conflicts of interest declared

9 **Curtis Handford:** Contract with Toronto Central Local Health Integration Network as primary  
10 care clinical lead for the mid-east Toronto sub-region.

11 **Shaun Hopkins:** No conflicts of interest declared

12 **Michelle Klaiman:** Speaker honoraria from the Ontario Pharmacists Association continuing  
13 education programs on the topic of opioid use disorder. I do not address take home naloxone  
14 beyond mentioning that the program exists (Major >\$5,000). Advisory Committee Member,  
15 Health Quality Ontario, Quality Standard on Opioid Use Disorder, but recused from voting on  
16 standards that involved take-home naloxone.

17  
18 **Pamela Leece:** Advisory Committee Member, Health Quality Ontario, Quality Standard: Opioid  
19 Use Disorder; Quality Statement 6 pertains to access to naloxone and overdose education.

20 **Janet Parsons:** No conflicts of interest declared

21 **Rita Shahin:** No conflicts of interest declared

22 **Carol Strike:** No conflicts of interest declared

23 **Kevin Thorpe:** No conflicts of interest declared

24 **Kate Sellen:** No conflicts of interest declared

25 **Geoffrey Milos:** No conflicts of interest declared

26 **Amy Wright:** No conflicts of interest declared

27 **Mercy Charles:** No conflicts of interest declared

28 **Ruby Sniderman:** No conflicts of interest declared

29  
30 **Laurie Morrison:** contributor to the 2015 guidelines and ILCOR consensus on science where  
31 opioid management was reviewed and updated.  
32  
33  
34  
35  
36  
37  
38  
39  
40  
41  
42  
43  
44  
45  
46  
47  
48  
49  
50  
51  
52  
53  
54  
55  
56  
57  
58  
59  
60

## 1 Abstract

### *Introduction:*

The Surviving Opioid Overdose with Naloxone Education and Resuscitation (SOONER) Project combines co-design and trial methods to develop and evaluate a point-of-care overdose education and naloxone distribution (OEND) tool. We plan to conduct a randomized controlled trial to assess the effectiveness of our OEND tool in comparison to the standard of care by observing participants' performance in a simulated overdose. Recruiting and retaining people at risk of or likely to witness opioid overdose raises scientific, logistical, and bioethical challenges. A mixed methods feasibility study is needed to establish the effectiveness of recruitment and retention strategies and the acceptability of study procedures in local recruitment sites prior to launching a full trial.

### *Methods and Analysis:*

Strategies to enhance recruitment include candidate-driven recruitment, verbal informed consent, and attractive, destigmatizing materials. Adults at risk of or likely to witness opioid overdose based on 2015 American Heart Association Guidelines will be recruited through an urban emergency department, inpatient and ambulatory addiction medicine service, and outpatient family practice. Participants randomized to the intervention arm will receive our OEND intervention, while those in the control arm will be referred to existing hospital or community OEND programs. Retention procedures include participant reminders, flexible scheduling, cash and comfort compensation, and continuity of relationship strategies. Within two weeks, participants will engage in a simulated overdose with a mannequin, and complete overdose knowledge and attitudes questionnaires. The primary outcome is recruitment and retention feasibility, defined as the recruitment of 28 participants within 4 weeks and less than 50% attrition at the overdose simulation. Staff and participant feedback will also be collected and considered.

### *Ethics & Dissemination*

The study has been reviewed by ethics boards at St. Michael's Hospital, Toronto Public Health, and the University of Toronto. Results will be disseminated through peer-reviewed publication and presentations.

**Trial registration:** Pending

## 2 Article Summary

### *Strengths and limitations of this study*

- This study tests the effectiveness of an integrated strategy to recruit and retain people who are at risk of or likely to witness opioid overdose.
- The strengths of the proposed recruitment and retention strategy are the involvement of community members in study design, cash and comfort compensation for participation, follow-up through multiple communications media, flexible scheduling for follow-up assessments, and attention destigmatizing language in research processes.
- If the study demonstrates feasibility, this recruitment and retention strategy will be ready for deployment in a full-scale randomized controlled trial.
- This strategy might be further enhanced through the involvement of peer workers and may require adaptation for use in other settings.

### 3 Background

Deaths from opioid overdose represent an important and expanding global epidemic [1]. Opioid Overdose Education and Naloxone Distribution programs (OEND) train and equip people who are likely to witness overdose to recognize these emergencies and administer essential first aid interventions including naloxone, a widely known and effective competitive opioid antagonist [2,3]. Policymakers and practitioners have called for expanded access to OEND programs in clinical settings or “point-of-care OEND”. Point-of-care OEND would improve access to this potentially life-saving intervention, and may have a role in emergency departments, family practice, addiction medicine and other inpatient and ambulatory care settings. Although clinicians are willing to provide OEND in principle, the complexity, time requirements for training, and current design of naloxone kits remain a barrier to widespread implementation. Effective tools are a prerequisite for widespread OEND implementation in a variety of ambulatory and inpatient care settings [4,5,6,7].

We plan to conduct a randomized trial to assess the effectiveness of a point-of-care OEND intervention in comparison to the current standard of care in an emergency department, family medicine and addictions medicine settings, by observing participants’ performance in a simulated overdose emergency.

Conducting trials among people who use drugs or who are likely to witness overdose involves scientific, logistical, socio-cultural, and bioethical challenges. These challenges contribute to the persistent under-evaluation of interventions to enhance the health of this population, and threats to study validity when retention rates are low [8]. There is also limited precedent for conducting resuscitation simulations for research participants who are patients or members of the lay public rather than health care trainees [9]. Most OEND research and program evaluations involve uncontrolled studies and convenience sampling without active follow-up, with elevated rates of attrition [10,11]. The only published simulation-based study of OEND education is an uncontrolled study among 103 people recently released from prison. The study achieved 82.5% retention (85 participants) at a 1-month follow-up simulation [12].

Before conducting a full-scale point-of-care OEND trial involving overdose simulations, a feasibility study is needed to establish the effectiveness of our planned recruitment and retention

1  
2  
3 strategies and the acceptability of study procedures in local recruitment sites. A feasibility study  
4 will permit the evaluation of basic randomization and data collection procedures, and create an  
5 opportunity to reconsider study design and analysis.  
6  
7

### 8 **3.1 Study Objectives**

9 The *primary objective* of this feasibility study is to identify if an integrated participant  
10 recruitment and retention strategy can recruit approximately 28 eligible participants within 4  
11 weeks, and maintain less than 50% attrition at the study's primary 2-week outcome assessment.  
12 This is in the context of a randomized trial on point-of-care OEND and simulated overdose  
13 resuscitation performance in urban and inner-city academic family practice, emergency  
14 department, and addiction medicine setting.  
15  
16

17 The *secondary objectives* of this study are to:  
18

- 19 1. assess the rate of participant recruitment in each of the family practice, emergency department, and addiction medicine  
20 sites at a single academic health care centre;
- 21 2. compare participant retention rates in the study intervention and control arms; and
- 22 3. to describe challenges and opportunities for improving study procedures for participants, study staff, and site staff with  
23 respect to all study processes including participant recruitment, randomization, implementation of the intervention and  
24 control, retention, follow-up, outcome assessment and data collection.  
25  
26  
27  
28

## 29 **4 Methods**

### 30 **4.1 The SOONER Project**

31 This feasibility study is part of the larger Surviving Opioid Overdose with Naloxone  
32 Education and Resuscitation (SOONER) Project, which combines co-design, clinical trial and  
33 community engagement methods. The goal of the SOONER Project is to develop and evaluate  
34 an effective point-of-care OEND tool, and to reduce opioid-related stigma and inequity. The  
35 SOONER Project consists of three phases: Phase I is a service design and participatory co-design  
36 initiative, where scientists, design researchers and community members co-created a point-of-  
37 care OEND toolkit [13,14] which will serve as the intervention for subsequent phases. Phase II is  
38 the feasibility study presented here, and Phase III is the subsequent randomized trial that will be  
39 developed based on the results of this feasibility study. Drawing on principles of community  
40 engagement and participatory research, community agencies and representatives with lived  
41 experience of opioid use and overdose are involved in all aspects of the project's development  
42 and implementation.[15,16]  
43  
44  
45  
46  
47  
48

### 49 **4.2 Feasibility Trial Design**

50 The proposed study is a mixed methods feasibility study to evaluate the recruitment and  
51 retention strategy and study logistics for a randomized trial.[17] The underlying randomized trial  
52 is a pragmatic, multi-site, 2-armed, parallel-group, best-available-care controlled, analyst- and  
53 outcome assessor-blinded, superiority trial of point-of care OEND training. The study protocol  
54 was developed as a feasibility study using the SPIRIT Statement and recommendations on  
55  
56  
57

1  
2  
3 standard elements for protocols for interventional trials, adapted where necessary for a feasibility  
4 study.[18]  
5

6  
7 The study has completed review with the Research Ethics Board affiliated with St.  
8 Michael's Hospital, Toronto Public Health, and the Toronto Academic Health Sciences Network.  
9 The protocol is pending registration through ClinicalTrials.gov (protocol number: )  
10  
11  
12  
13  
14  
15

#### 16 **4.2.a Participants**

17  
18 Participants will be recruited through three study settings, all associated with St. Michael's Hospital: (1) Emergency Department,  
19 (2) inpatient and ambulatory Addiction Medicine Service, and (3) Family practice. Primary outcome assessment will occur through a  
20 follow-up visit at the St. Michael's Hospital Allan Waters Family Simulation Centre (SMH Simulation Centre). Although the three  
21 recruitment settings are all affiliated with the same hospital, the trial is termed "multi-site" because of the substantial difference between  
22 the clinical contexts in the three recruitment settings.  
23  
24  
25

26 The three recruitment settings provide routine clinical services to people at risk of opioid overdose and likely to witness overdose,  
27 but each with widely differing clinical interactions and follow-up procedures. These sites have been selected to strike a balance between  
28 study generalizability, pragmatism, and feasibility [19]. The chosen settings will permit recruitment of study participants representing a  
29 diverse urban population, with varied access to and use of emergency services, primary care and addiction treatment services.  
30  
31  
32

#### 33 **4.2.b Eligibility**

34 Participants will be adults  $\geq 16$  years of age who may benefit from OEND using criteria  
35 adapted from the 2015 American Heart Association Guidelines on Cardiopulmonary  
36 Resuscitation in Special Circumstances (see Table 1 for detailed inclusion and exclusion  
37 criteria).  
38  
39  
40  
41  
42  
43  
44  
45  
46  
47  
48  
49  
50  
51  
52  
53  
54  
55  
56  
57



**Table 1: Study Inclusion and Exclusion Criteria**

**Inclusion Criteria: Participants are eligible by meeting any one or more of the following:**

1. Have a history of taking opioids at recognized 'high doses' (whether by prescription or otherwise, defined as >100mg morphine equivalent per day).
2. Live with or is in frequent contact with others who use opioids or heroin.
3. Have required emergency care for opioid overdose previously.
4. Are enrolled in opioid agonist treatment programs (or has been in the last 6 months), including methadone or buprenorphine maintenance programs, particularly at high risk periods such as induction or discharge.
5. Are being released from prison, and have a history of non-medical opioid use.
6. Are receiving prescription opioid therapy with risk factors for adverse effects, including relevant comorbidities, co-prescriptions of benzodiazepines or other sedatives, concomitant ongoing alcohol use, or high dose prescription opioid therapy.
7. Uses non-medical opioids, injects opioids, or acquires opioids from sources other than a pharmacy or healthcare setting.

**Exclusion Criteria: Participants are ineligible by meeting any one or more of the following:**

1. Have a community do not resuscitate order.
2. Have a terminal illness, end-of-life care, or illness likely to result in death within the study period.
3. Have no mode of contact or follow-up.
4. Plan to move away from Toronto during the study period.
5. Have insufficient English language skills to participate in the study.
6. Are an active or previously practicing healthcare professional or professional first responder (e.g.: firefighter, police officer, lifeguard, industrial first responder).

Sixteen was chosen as the minimum participant age to (a) recognize that opioid use is a growing concern among adolescents, (b) affirm the importance of including youth in low-risk research where this population stands to benefit, (c) recognize that other basic life support studies have been conducted in children, while (d) avoiding perceptions that the study extends to research with highly vulnerable populations if a lower minimum age were chosen. [20-,22]

Since the study concerns resuscitation and first aid training, people with a "Do Not Resuscitate" order or directive are excluded because such an order may reasonably alter a participant's interest in or desire to learn resuscitative skills. For candidates who decline to participate in the study, we will retain the data collected in the recruitment questionnaire and request consent to collect demographic data to compare the characteristics of study participants and non-participants.

#### 4.2.c Sample Size

Approximately twenty-eight (28) participants will be recruited to the feasibility study, composed of between eight and twelve (8 and 12) participants from each of the St. Michael's

1  
2  
3 Family practice, Emergency Department, and Addiction Medicine Service (including hospital  
4 consult service and Rapid Access Clinic). We ran a sample size sensitivity analysis based on the  
5 computation of a confidence interval for the binomial distribution and selected 28 participants.  
6 With a sample size of 28 participants, we will be able to estimate a participation rate of 65% with  
7 a one-sided 95% confidence interval of 14.8%.  
8  
9

$$0.148 = 0.1645 \cdot \sqrt{0.65 \cdot \left(\frac{1 - 0.65}{28}\right)}$$

10  
11  
12  
13  
14 Therefore, if at least 19 participants are retained we will be able to assert that any retention  
15 rate below 50% falls outside a 95% confidence interval for the retention rate point estimate. In a  
16 worst-case-yet-feasible scenario, the feasibility trial would require 4 weeks for recruitment and  
17 would observe a retention rate of 65%.  
18  
19

#### 20 4.2.d Allocation

21  
22 Participants will be assigned to either control or intervention group with 1:3 allocation by computerized randomisation schedule.  
23 Unbalanced allocation was selected for the feasibility study to gather additional information about study processes in the intervention arm,  
24 since the control arm incorporates existing processes of care.  
25  
26

27  
28 In instances where eligible and consenting participants present as a part of a single clinical encounter (for example, a patient at  
29 risk of overdose presenting to the emergency department with his/her spouse), both participants will be randomized to the same study  
30 arm to avoid overt contamination between intervention and control arms. Randomisation will be stratified by site, using permuted blocks  
31 of random sizes. Block sizes will not be disclosed to ensure concealment.  
32  
33

#### 34 4.2.e Interventions

35  
36 Study participants randomized to the treatment arm of the study will receive brief overdose  
37 first aid training and a naloxone kit. The intervention will involve the following:  
38  
39

- 40 1. Abbreviated point-of-care OEND training according to the training program adapted from the Toronto Public  
41 Health Prevention Overdose in Toronto (POINT) Program [23,24]. The key aspects of this training are:
  - 42 a. Identify life threatening overdose.
  - 43 b. Activate 911 services.
  - 44 c. Prepare and administer intranasal naloxone.
  - 45 d. Perform chest compressions.
  - 46 e. Reassess and repeat naloxone administration.
  - 47 f. Continue chest compressions until paramedics arrive.
- 48 2. A naloxone kit containing 2 doses of Narcan© naloxone hydrochloride, each 4mg intranasal (Adapt  
49 Pharmaceuticals), and administration instructions.  
50  
51  
52

53  
54 Training will be provided at the three recruitment settings in the clinical environment in  
55 which the participant is receiving care (clinic room, emergency department room or hallway bed  
56  
57

1  
2  
3 etc.). A dedicated research staff person trained in basic cardiopulmonary resuscitation, first aid  
4 and overdose education, and anti-oppression techniques will provide training and naloxone kits  
5 to the participant. Clinicians will not provide training for the participant.  
6  
7

8 If the purpose-designed point-of-care OEND toolkit from Phase I of the SOONER Project  
9 is available before or during the feasibility study, participants randomized to the intervention arm  
10 will receive the custom-designed intervention instead. This will contain all of the elements of  
11 the intervention described above, but physically designed to facilitative brief training and  
12 distribution in clinical settings.  
13  
14

15 Study participants randomized to the control arm will receive the present best available standard of care. Control group  
16 instructions will recommend that clinicians proceed with care exactly as they would outside of the trial. Dedicated research staff will  
17 provide participants randomized to the control arm with a referral to the Toronto Public Health "The POINT" Program where intranasal  
18 naloxone and associated training is provided. If the Ontario Ministry of Health and Long-Term Care begins to supply intranasal naloxone  
19 at retail pharmacies before or during the study, participants will also be provided with a referral to local retail pharmacies that offer OEND  
20 with intranasal devices. If clinic or hospital-based naloxone distribution programs are in effect, control arm participants may also be  
21 referred or included in those programs.  
22  
23  
24  
25

#### 26 27 **4.2.f Study Procedures**

28 Study procedures are shown in detail in Table 2. Study visits will involve (1) the initial  
29 enrolment session and training for participants randomized to the intervention arm, (2) a follow-  
30 up between 3 and 14 days post-enrolment to participate in the simulated overdose event and  
31 administer the knowledge and attitudes questionnaire, and (3) a follow-up at 3 months (+/- 14  
32 days) to repeat knowledge and attitudes questionnaires by telephone or in-person. This latter 3-  
33 month follow-up is included to allow comparison of our results and study population with other  
34 studies using a 3-month follow-up with the same questionnaires. [25,26,27]  
35  
36  
37

38 Participants who miss a scheduled visit may reschedule their visit at a mutually convenient  
39 time. Out-of-window visits will be permitted and noted in the final report. Study staff will also  
40 collect informal feedback from personnel at all study sites throughout recruitment to describe  
41 challenges, and opportunities for quality improvement of study processes.  
42  
43  
44  
45  
46  
47  
48  
49  
50  
51  
52  
53  
54  
55  
56  
57

**Table 2: Study Procedures Timetable**

| Assessment/Activity                              | Enrolment Visit | Outcome Simulation, Knowledge and Attitudes Questionnaires, Interview (3-14 days) | Knowledge and Attitudes Questionnaires (3 months)* |
|--------------------------------------------------|-----------------|-----------------------------------------------------------------------------------|----------------------------------------------------|
| Eligibility Questionnaire                        | x               |                                                                                   |                                                    |
| Informed Consent                                 | x               |                                                                                   |                                                    |
| Demographic Data Collection                      | x               |                                                                                   |                                                    |
| Tertiary Clinical Outcome Baseline Questionnaire | x               |                                                                                   |                                                    |
| Randomisation                                    | x               |                                                                                   |                                                    |
| Intervention Training or Control Referral        | x               |                                                                                   |                                                    |
| Outcome Simulation and Assessment                |                 | x                                                                                 |                                                    |
| Knowledge and Attitudes Questionnaire            | x               | x                                                                                 | x                                                  |
| Follow-Up Interview                              |                 | x                                                                                 |                                                    |

\*3-month Knowledge and Attitudes Questionnaire completed only by participants who (a) inject drugs, or (b) are friends or family members of people who inject drugs (see Section 2.5.c: Tertiary Clinical Outcomes).

### 4.3 Recruitment and Retention Strategies

We expect our underlying study could be affected by attrition, as many participants experience unstable housing or incarceration, overdose or other health problems, may be difficult to reach by phone, and may experience stigma associated with opioid use. The recruitment and retention strategies under investigation in this feasibility study build on existing research on incentivising and improving clinical trial participation among people who use opioids [42,43]. (See Figure 1: Study Schematic, Recruitment and Retention Strategies.)

Figure 1.

#### 4.3.a Recruitment

*Candidate-driven recruitment:* Candidates will be identified and recruited to the study according to a uniform general procedure, with site-specific modifications according to the practice patterns and operational needs of the 3 different clinical settings. All patients will be given an ultra-brief information card asking (a) if they take opioids or have a friend or family member who uses opioids, and (b) if they would be interested in participating in a study concerning OEND training. The card will indicate that patients should notify any of the clinical staff if they answer “yes” to both of these questions. The clinician or administrative staff will then notify study personnel, who will approach the candidate to determine eligibility, obtain informed consent, randomize the participant and implement the intervention.

This “candidate-driven” recruitment procedure was designed to reduce recruitment biases and the stigma of study recruitment by informing all patients of the study and allowing people in clinical settings to self-identify as interested and potentially eligible for study enrolment. By distributing the informational card to all patients, this recruitment method reduces the effect of

1  
2  
3 clinician biases and prejudices regarding which patients are at risk of opioid overdose because all  
4 patients are alerted to the study. Candidates may self-identify their potential eligibility in  
5 circumstances where clinicians are unaware of their eligibility. By using an informational card  
6 rather than the more conventional practice of recruitment posters, patients and study candidates  
7 can be alerted to the study and discuss their interest in participating with staff discreetly, without  
8 having to point at or read a poster placed in a public area. This serves to protect confidentiality,  
9 normalize the information given to all patients, and positions patients as the initiators of the  
10 recruitment process.  
11  
12  
13

14  
15 *Improved informed consent:* Lengthy written consent forms may deter study candidates  
16 from participating in research, without improving the quality of informed consent or the  
17 knowledge of participants.[28] Written signed consent may be perceived as an attempt to  
18 legalize the consent process and may itself deter participants in this study. We therefore favour  
19 oral or verbal consent for this trial.[29] A systematic review on strategies to improve informed  
20 consent processes in trials found that having a study team member spend more time talking one-  
21 on-one with trial candidates was the most effective available way of improving research  
22 participants' understanding.[30] Informed consent will be obtained through a verbal process,  
23 assisted with a visual map of study procedures and a brief 2-page script, with ample time for  
24 participants to ask questions and discuss each phase of the study.  
25  
26  
27  
28

29  
30 *Attractive, destigmatizing trial materials:* Study informational materials, consent forms,  
31 and consent processes have also been designed to reduce barriers to trial recruitment. Developed  
32 through the SOONER Project's collaboration with design researchers and drawing on  
33 participatory co-design methods, study handouts have been written in plain, destigmatizing and  
34 inviting language, and graphically designed to avoid stigmatizing imagery associated with opioid  
35 use and overdose.  
36  
37

#### 38 4.3.b Retention

39  
40 *Gathering contact information:* At enrolment, participants will know that they will be  
41 followed over time, and we will specify the timetable and methods that will be used to contact  
42 them. We will collect multiple points of contact based on participant preferences, including  
43 phone numbers (for phoning and text messages), email addresses, and mailing addresses. As an  
44 alternate means of contact, we will ask to collect the names of two friends, relatives, case  
45 managers, clinics, community centres, or shelters with whom participants have regular contact.  
46 Participants will be provided with multiple methods to contact study personnel, including  
47 dropping in at recruitment sites, phoning, emailing, or speaking to any of the staff associated  
48 with the study.  
49  
50  
51  
52

53 *Flexible scheduling:* Outcome Assessment Simulations will be scheduled flexibly and  
54 outside business hours if required. We will offer to meet participants at their recruitment location  
55 and walk with them to the simulation centre if needed. The short (maximum 2-week) interval for  
56  
57

1  
2  
3 the primary outcome evaluation will reduce attrition for our primary outcome. Research staff  
4 will schedule participants' follow-up simulation for between 4 days and 1 week after  
5 randomization. This leaves at least 1 week for rescheduling before the 2-week maximum follow-  
6 up time. Participants will be able to select a time for the simulation outcome assessment that  
7 meets their scheduling needs. Participants will also receive a study card with the simulation time  
8 and location as well as contact information of the research coordinator.  
9  
10

11  
12 *Reminders and follow-up:* Based on advice from community representatives on the study  
13 steering committee, we developed a communication and reminder strategy to suit the  
14 participants' diverse needs and contexts. Many members of the target population face tenuous  
15 housing and limited financial resources, but many do have cellular phones. For many,  
16 communication by letter mail will be untimely and ineffective. Limited financial resources mean  
17 that many participants may not have daytime telephone "minutes" and do not take incoming  
18 calls, preferring instead to communicate by text message. We emphasize the use of text message  
19 reminders, drawing on research demonstrating the feasibility and effectiveness of text messaging  
20 for participant retention in randomized trials.[31]  
21  
22  
23

24  
25 Participants will be asked to choose their preferred and secondary method of contact from  
26 phone call, text message or email. Participants will be contacted by their preferred and secondary  
27 method 5, 3 and 1 day(s) before their scheduled simulation and on the morning of their  
28 simulation to confirm attendance or reschedule, with up to 3 attempts on each of the days of  
29 contact. In addition, consenting participants will receive a letter prior to the outcome assessment.  
30 Participants will be contacted one week before the 3-month assessment via their preferred  
31 method of contact. Communication scripts will be used when contacting participants and  
32 messages will not refer to details of the study or to opioid use.  
33  
34  
35

36  
37 *Continuity of relationships:* We will strive for consistency in research staff-participant  
38 pairing to enhance rapport and build trust, which has been shown to improve patient recruitment  
39 and retention.[32] All staff have received anti-oppression training. Wherever possible, the same  
40 SOONER staff person who conducts informed consent and recruits a study participant will serve  
41 as the point of contact for a given study participant. Study staff will welcome participants at the  
42 research institute lobby for outcome visits and accompany them to the assessment centre.  
43  
44

45  
46 *Cash and other compensation:* Participants will receive cash per study visit: (1) \$15 after  
47 consenting to trial activities, (2) \$40 upon arrival for the simulation, and (3) \$20 upon  
48 completion of a follow up interview. Participants will be offered public transit tokens for travel  
49 to and from each study visit, snacks, and light refreshments at each study visit. The amount of  
50 remuneration proposed in our study for the time required from our participants is consistent with  
51 amounts provided in other studies with this population, and payments like those proposed here  
52 are effective to improve retention without demonstrating a coercive effect on participants nor  
53 precipitating drug use behaviours.[33,34]  
54  
55  
56  
57

## 4.4 Feasibility Outcomes

### 4.4.a Primary Outcome

The primary outcome is the feasibility of recruitment and retention. The recruitment and retention strategy will be deemed “feasible” if approximately 28 eligible participants are recruited within 4 weeks and if attrition is less than 50% for the underlying study’s primary outcome assessment (overdose simulation) at 3-14 days (see Table 2). We will optimize our recruitment strategy at each site before setting “time zero” for 4 weeks of recruitment. These outcomes will be recorded using data from the recruitment and retention log. We will compute the attrition at the Outcome Simulation and 95% binomial proportion confidence interval.

### 4.4.b Secondary Outcomes:

The secondary outcomes will be:

- (1) Proportion of eligible participants (people who meet enrolment criteria) who do not consent to the study, as reported in the study log.
- (2) Proportion of participants who drop out at the outcome assessment simulation. Dropout at the outcome assessment will be defined as people who attend the outcome simulation but do not complete the simulation or withdraw from the study, as reported in the study log.

### 4.4.c Tertiary Outcomes

The perspectives of participants will be gathered through a 15-minutes individual semi-structured interview conducted at the outcome simulation visit. The interviews will be audio recorded and transcribed and the acceptability of study processes and opportunities for quality improvement will be analyzed thematically and reported by theme, and with representative quotes. The tertiary outcomes will be acceptability of recruitment, retention and outcome assessment procedures for study participants, and for staff at recruitment sites and the Simulation Centre.

The recruitment and retention strategy will undergo basic quality improvement throughout the study based on the observations of research personnel and their interactions with recruitment site staff. Research personnel will gather informal feedback from recruitment site staff and simulation centre staff regarding quality improvement of the study procedures, and difficulties encountered with respect to recruitment and retention of study participants. The insights gained will be used to make minor changes to improve the quality of study processes. Study staff will keep a quality improvement log to record the feedback received from site staff and discuss feedback at weekly team meetings.

## 4.5 Clinical Outcomes

Clinical outcomes will be gathered but will not be analyzed or reported within the feasibility study.

### 4.5.a Primary Clinical Outcome:

1  
2  
3 The primary outcome will be the proportion of resuscitation failures in a standardized  
4 high-fidelity overdose simulation conducted at the Simulation Centre. Simulations will be  
5 conducted with individual participants privately, and not in a group or with other participants  
6 observing.  
7  
8

9 The simulation itself is adapted from analogous studies and, refined to mimic a realistic  
10 overdose situation [12,35,36,37]. The resuscitation sequence checklist is based on the 2015  
11 American Heart Association bystander resuscitation recommendations. [38] The scenario is  
12 intended to simulate a critically life-threatening opioid overdose, where the victim will be found  
13 with no signs of life and deteriorate rapidly to opioid-related cardiac arrest. A telephone in the  
14 simulation room will be available to simulate a phone call to 911 dispatch. Study participants  
15 will be briefed and oriented to the room using a standardized script and instructed to perform as  
16 if the simulation were real. The simulation will end with the announcement of paramedics'  
17 arrival, after approximately 10 minutes. Dedicated staff will provide a standardized semi-  
18 structured debrief for participants using a standardized framework [39]. This debrief can include  
19 direct feedback and opportunities to correct techniques, affirm positive behaviours, as well as set  
20 the stage for reflection [39,40].  
21  
22  
23  
24  
25

26 Simulations will be video recorded, and performance assessments will be conducted based on  
27 the video recordings. Data collection will occur using a combination of a simple checklist and  
28 resuscitation simulator manikin, arranged to create a high-fidelity simulated overdose situation  
29 similar to the simulation described by Kobayashi et al [12]. Assignment of the global assessment  
30 score will be based on a consensus of two assessors. Any discrepancy in the assessments of the  
31 simulation evaluators will be adjudicated by a lead investigator.  
32  
33

#### 34 *4.5.b Secondary Clinical Outcome*

35

36 The secondary clinical outcome will be performance on eight skills: (1) Recognize the  
37 emergency, (2) Position the victim, (3) Activate emergency medical services, (4) Administer  
38 naloxone (prepare device, administer correctly), (5) Hand placement, (6) Chest compressions  
39 (rate and depth), (7) Continue compressions until end of simulation, and (8) Order of operations  
40 and organization.  
41  
42

43 These eight indicators were adapted from previous CPR and first response training  
44 intervention studies, and include both objective measures recorded by the resuscitation manikin  
45 and subjective measures assessed by the simulation assessor.[35,36,37] Assessors will rate each  
46 skill as satisfactory or unsatisfactory. Data collection will occur using a validated basic life  
47 support checklist and resuscitation manikin data, modified for OEND.[41] Non-indicated  
48 resuscitative actions will also be documented. These include rescue breathing, incorrect  
49 naloxone administration, or any other medication administration. For rescue breathing, we will  
50 collect the ventilation data automatically recorded by the resuscitation manikin.  
51  
52  
53  
54  
55  
56  
57



#### 4.5.c *Tertiary Clinical Outcomes:*

An interviewer-administered questionnaire will be used at enrolment, at the simulation and at 3 months to measure tertiary clinical outcomes related to participants' knowledge about overdose, confidence and willingness to intervene in overdose, reported responses to witnessing overdose events, self-assessed barriers to responding to an overdose, and self-reported drug overdose risk behaviours. The questionnaire will be scripted to reduce variability between interviewers.

The questionnaires contain both close-ended questions and open-ended questions, developed for the Toronto Public Health OEND program evaluation [23]. Questionnaire items were developed using data points from other OEND programs and from the validated Opioid Overdose Knowledge and Attitudes Scales (OOKS and OOAS) [25]. Although the OOKS and OOAS are validated tools, they have been validated only among people who inject drugs and the family members of people who inject drugs, especially heroin [26,27]. These studies have assessed the effectiveness of OEND programs using comparisons of OOKS and OOAS scores before and 3 months after training. Therefore, to permit comparison with these studies, participants who inject drugs or who are friends or family members of people who inject drugs will be asked to return to complete the OOKS and OOAS at 3 months after enrolment.

## 5 Discussion

The proposed study will test study procedures and the feasibility of an integrated recruitment and retention strategy for people likely to witness opioid overdose in the context of an OEND trial using a simulated opioid overdose event for outcome assessment.

Published strategies to improve participant retention include the involvement of community members in study design and implementation, cash and comfort compensation for study participation, regular follow-up through multiple communications media, building trust and improving communication around trial methods, and flexible hours and scheduling for follow-up assessments [32,42,43,44]. Attention to patient-centered, destigmatizing and participatory language in research processes may also enhance participant recruitment and retention [45]. The integration of these elements is the primary strength of our proposed recruitment and retention strategy. Additional strengths include our use of participatory co-design methods for the development of study interventions and materials, and ongoing engagement with people with lived experience of opioid use for study implementation. Recruitment and retention for this study might be further strengthened by engaging peer workers directly in participant recruitment and retention. Although this approach has been successful in other studies with similar populations, in the context of a study designed to test the effectiveness of OEND in a broad variety of clinical settings, we felt that the introduction of peer workers would act as a cointervention and reduce the scalability of the intervention.[19,46,47,48]. Since the study is occurring in an urban population and a randomized trial, our results may not be generalizable to other settings, clinical contexts or study designs. However, if the study demonstrates feasibility, this recruitment and retention strategy will be ready for deployment in a full-scale trial, and potentially for adaptation to other settings.

## 6 Ethics and Dissemination

The study has been reviewed by ethics boards at St. Michael's Hospital, Toronto Public Health, and the University of Toronto. Results will be disseminated through peer-reviewed publication and scholarly presentations, and through the SOONER Project's network of community agencies and people with lived experience of opioid use and overdose.

## 7 Author Statement

All authors conceptualized the study and acquired funding. RS, MC and AO undertook project administration, and LM and CS supervised the project. All authors contributed to the design and methodology of the study. AO prepared the first draft of the manuscript. All authors contributed to revising and approving the final manuscript.

## 8 Acknowledgements

The authors thank Rekha Thomas and Kristine Norris for their role in finalizing this protocol and manuscript preparation and submission. We thank Audra Stitt and Kate Byrne for their contribution to project management. We also acknowledge the Alan Waters Simulation Centre and staff and other staff at Rescu and the Applied Health Research Centre for assisting with this project. We acknowledge Laerdal Ltd. For donating a resuscitation mannequin, Adapt Pharma for donating naloxone delivery devices and placebo devices, and Made Good for donating snacks for participants to the proposed study. None of these companies provided a financial contribution or had any access to or role in the development or conduct of the proposed study.

## 9 References

- 1 United Nations Office on Drugs and Crime, World Health Organization. Discussion paper UNODC/WHO 2013: Opioid overdose: preventing and reducing opioid overdose mortality. 2013; Available at: <http://www.unodc.org/docs/treatment/overdose.pdf>. Accessed 04/23, 2014. Archived by WebCite© at <http://www.webcitation.org/6U3qbjl2E>
- 2 Clark AK, Wilder CM, Winstanley EL. A systematic review of community opioid overdose prevention and naloxone distribution programs. *J Addict Med*. 2014;8:153-163.
- 3 Doyon S, Aks SE, Schaeffer S. Expanding access to naloxone in the United States. *Clin Toxicol (Phila)*. 2014:1-4.
- 4 Beletsky L, Ruthazer R, Macalino GE, Rich JD, Tan L, Burris S. Physicians' knowledge of and willingness to prescribe naloxone to reverse accidental opiate overdose: challenges and opportunities. *Journal of Urban Health*. 2007;84:126-136.

1  
2  
3  
4 **5** Coffin PO, Fuller C, Vadnai L, Blaney S, Galea S, Vlahov D. Preliminary evidence of health  
5 care provider support for naloxone prescription as overdose fatality prevention strategy in  
6 New York City. *Journal of Urban Health*. 2003;80:288-290.

7  
8  
9  
10 6 Lacroix L, Thurgur L, Orkin AM, Perry JJ, Stiell IG. Emergency physicians' attitudes and perceived barriers to the implementation of  
11 take-home naloxone programs in Canadian emergency departments. *CJEM* 2017, Sep 18:1-7.

12  
13 7 Leece P, Orkin A, Shahin R, Steele LS. Can naloxone prescription and overdose training for opioid users work in family practice?  
14 Perspectives of family physicians. *Canadian Family Physician*. 2015;61(6):538-43.

15  
16  
17 **8** Meyers K, Webb A, Frantz J, Randall M. What does it take to retain substance-abusing adolescents in research protocols? Delineation of  
18 effort required, strategies undertaken, costs incurred, and 6-month post-treatment differences by retention difficulty. *Drug*  
19 *Alcohol Depend* 2003, Jan 24;69(1):73-85.

20  
21  
22 **9** Kobayashi L, Green TC, Bowman SE, Ray MC, McKenzie MS, Rich JD. Patient simulation for assessment of layperson management of  
23 opioid overdose with intranasal naloxone in a recently released prisoner cohort. *Simulation in Healthcare* 2017, Jan 9; Publish  
24 Ahead of Print.

25  
26  
27  
28 10 Clark AK, Wilder CM, Winstanley EL. A systematic review of community opioid overdose prevention and naloxone distribution  
29 programs. *J Addict Med* 2014;8(3):153-63.

30  
31  
32 11 Orkin AM, Bingham K, Buick JE, Klaiman M, Leece P, Kouyoumdjian FG. "Quality Assessment Errors and Study Misclassification  
33 Threaten Systematic Review Validity: Community Opioid Overdose Prevention and Naloxone Distribution Programs Review: Re:  
34 Clark AK, Wilder CM, Winstanley EL. A systematic review of community opioid overdose prevention and naloxone distribution  
35 programs." *J Addict Med* 2014 May-June;8(3): 153-163. *J Addict Med*. 2015 Dec;9(6):502-3.

36  
37  
38 **12** Kobayashi L, Green TC, Bowman SE, Ray MC, McKenzie MS, Rich JD. Patient simulation for assessment of layperson management of  
39 opioid overdose with intranasal naloxone in a recently released prisoner cohort. *Simulation in Healthcare* 2017, Jan 9; Publish  
40 Ahead of Print.

41  
42  
43 13 Friere K, Sangiorgi D. Service design and healthcare innovation: From consumption to co-production and co-creation. In *Service Design*  
44 *and Service Innovation conference 2010* (pp. 39-50). Linköping Electronic Conference Proceedings.

45  
46  
47 14 Donetto S, Pierri P, Tsianakas V, Robert G. Experience-based Co-design and Healthcare Improvement: Realizing Participatory Design in  
48 the Public Sector. *The Design Journal*. Routledge; 2015 May 7;18(2):227-48.

49  
50 15 Shippee ND, Domecq Garces JP, Prutsky Lopez GJ, Wang Z, Elraiyah TA, Nabhan M, Brito JP, Boehmer K, Hasan R, Firwana B, Erwin  
51 PJ. Patient and service user engagement in research: a systematic review and synthesized framework. *Health Expectations*.  
52 2015 Oct 1;18(5):1151-66.

- 1  
2  
3  
4 16 Wallerstein NB, Duran B. Using Community-Based Participatory Research to Address Health Disparities. *Health Promotion Practice*. 2nd  
5 ed. Sage Publications: Thousand Oaks, CA; 2016 Jun 30;7(3):312-23.  
6  
7  
8 17 Eldridge SM, Lancaster GA, Campbell MJ, Thabane L, Hopewell S, Coleman CL, Bond CM. Defining feasibility and pilot studies in  
9 preparation for randomised controlled trials: Development of a conceptual framework. *PLoS One* 2016;11(3):e0150205.  
10  
11  
12 18 Chan A-W, Tetzlaff JM, Altman DG, Laupacis A, Gøtzsche PC, Krležić J, et al. SPIRIT 2013 statement: defining standard protocol  
13 items for clinical trials. *Annals of internal medicine*. 2013;158(3):200-7.  
14  
15  
16 19 Thorpe KE, Zwarenstein M, Oxman AD, et al. A pragmatic—explanatory continuum indicator summary (PRECIS): a tool to help trial  
17 designers. *J Clin Epidemiol*. 2009;62:464-475.  
18  
19 20 Madadi P, Hildebrandt D, Lauwers AE, Koren G. Characteristics of opioid-users whose death was related to opioid-toxicity: a  
20 population-based study in Ontario, Canada. *PLoS One*. 2013;8:e60600.  
21  
22  
23 21 Canadian Institutes of Health Research, Natural Sciences and Engineering Research Council of Canada and Social Sciences and  
24 Humanities Research Council of Canada. **Tri-Council Policy Statement: Ethical Conduct for Research Involving Humans**,  
25 December 2010. Available: [www.pre.ethics.gc.ca](http://www.pre.ethics.gc.ca). Accessed 1 December 2014.  
26  
27  
28 22 Hurst B, Buick J, Cote J, Kirsh JA, Dainty KN, Morrison LJ, Yu M, Cheskes S. CPR Anytime Any School: a randomized trial of  
29 strategies to teach CPR and use of AED to high school students. *Can J Emerg Med*. 2012;14:S1  
30  
31 23 Leece PN, Hopkins S, Marshall C, Orkin A, Gassanov MA, Shahin RM. Development and  
32 implementation of an opioid overdose prevention and response program in Toronto,  
33 Ontario. *Can J Public Health*. 2013;104:e200-e204.  
34  
35  
36 24 Leece P, Marshall C, Millson P. Process evaluation of the prevent overdose in Toronto (POINT) program. *Canadian Journal of Public*  
37 *Health* 2016;107(3):224.  
38  
39  
40 25 Williams AV, Strang J, Marsden J. Development of Opioid Overdose Knowledge (OOKS) and Attitudes (OOAS) Scales for take-home  
41 naloxone training evaluation. *Drug Alcohol Depend*. 2013;132:383-386.  
42  
43  
44 26 Williams AV, Marsden J, Strang J. Training family members to manage heroin overdose and administer naloxone: Randomized trial of  
45 effects on knowledge and attitudes. *Addiction* 2014, Feb;109(2):250-9.  
46  
47  
48 27 Lott DC, Rhodes J. Opioid overdose and naloxone education in a substance use disorder treatment program. *Am J Addict* 2016,  
49 Apr;25(3):221-6.  
50  
51  
52 28 Beardsley E, Jefford M, Mileshekin L. Longer Consent Forms for Clinical Trials Compromise Patient Understanding: So Why Are They  
53 Lengthening? *Journal of Clinical Oncology*. American Society of Clinical Oncology; 2016 Sep 21;25(9):e13-4.  
54  
55  
56  
57  
58  
59  
60

- 1  
2  
3  
4  
5 29 Health Canada. Tri-Council Policy Statement 2, Chapter 3: The Consent Process. Online: <http://www.pre.ethics.gc.ca/eng/policy-politique/initiatives/tcps2-eptc2/chapter3-chapitre3/#toc03-1d>. Accessed 17 February 2018.  
6  
7  
8  
9 30 Flory J, Emanuel E. Interventions to Improve Research Participants' Understanding in Informed Consent for Research: A Systematic  
10 Review. *JAMA*. American Medical Association; 2004 Oct 6;292(13):1593-601.  
11  
12 31 Varner C, McLeod S, Nahiddi N, Borgundvaag B. Text messaging research participants as a follow-up strategy to decrease emergency  
13 department study attrition. *Canadian journal of emergency medicine*. 2017:1-6.  
14  
15  
16 32 Neale J, Tompkins CNE, McDonald R, Strang J. Improving recruitment to pharmacological trials for illicit opioid use: Findings from a  
17 qualitative focus group study. *Addiction*. 2018 Jan 22.  
18  
19  
20 33 Festinger DS, Marlowe DB, Dugosh KL, Croft JR, Arabia PL. Higher magnitude cash payments improve research follow-up rates without  
21 increasing drug use or perceived coercion. *Drug and alcohol dependence*. 2008;96(1):128-35.  
22  
23  
24 34 Festinger DS, Marlowe DB, Croft JR, Dugosh KL, Mastro NK, Lee PA, et al. Do research payments precipitate drug use or coerce  
25 participation? *Drug and alcohol dependence*. 2005;78(3):275-81.  
26  
27  
28 35 Lynch B, Einspruch EL, Nichol G, Becker LB, Aufderheide TP, Idris A. Effectiveness of a  
29 30-min CPR self instruction program for lay responders: a controlled randomized study.  
30 *Resuscitation*. 2005 Oct;67(1):31-43.  
31  
32  
33 36 Neset A, Birkenes TS, Furunes T, Myklebust H, Mykletun RJ, Ødegaard S, et al. A  
34 randomized trial on elderly laypersons' CPR performance in a realistic cardiac arrest  
35 simulation. *Acta Anaesthesiol Scand* 2012 Jan; 56(1):124-131.  
36  
37  
38 37 Neset A *et al*. A randomized trial on elderly laypersons' CPR performance... *Acta Anaesthesiol*  
39 *Scand*. 2012 Jan;56(1):124-31.  
40  
41 38 Lavonas EJ, Drennan IR, Gabrielli A, Heffner AC, Hoyte CO, Orkin AM, et al. Part 10: Special Circumstances of Resuscitation: 2015  
42 American Heart Association Guidelines Update for Cardiopulmonary Resuscitation and Emergency Cardiovascular Care.  
43 *Circulation*. United States; 2015 Nov 11;132(18 Suppl 2):S501-18.  
44  
45  
46 39 Eppich W, Cheng A. Promoting excellence and reflective learning in simulation (PEARLS): Development and rationale for a blended  
47 approach to health care simulation debriefing. *Simulation in Healthcare* 2015, Apr;10(2):106.  
48  
49 40 Dreifuerst, KT. The Essentials of Debriefing in Simulation Learning... *Nurs Edu Perspec*  
50 30.2 (2009): 109-114.  
51  
52 41 Whitfield RH *et al*. Reliability of the Cardiff Test... *Resuscitation*. 2003 Dec;59(3):291-314.  
53  
54 42 Festinger DS, Marlowe DB, Dugosh KL, Croft JR, Arabia PL. Higher magnitude cash payments improve research follow-up rates  
55 without increasing drug use or perceived coercion. *Drug Alcohol Depend* 2008;96(1):128-35.  
56  
57

- 1  
2  
3  
4  
5  
6 43 Scott CK. A replicable model for achieving over 90% follow-up rates in longitudinal studies of substance abusers. *Drug Alcohol*  
7 *Depend* 2004, Apr;74(1):21-36.  
8  
9  
10 44 Varner C, McLeod S, Nahiddi N, Borgundvaag B. Text messaging research participants as a follow-up strategy to decrease emergency  
11 department study attrition. *CJEM* 2017, Jan 9:1-6.  
12  
13  
14 45 van Boekel LC, Brouwers EP, van Weeghel J, Garretsen HF. Stigma among health professionals towards patients with substance use  
15 disorders and its consequences for healthcare delivery: Systematic review. *Drug Alcohol Depend* 2013, Jul 1;131(1-2):23-35.  
16  
17 46 Valente TW, Zogg JB, Christensen S, Richardson J, Kovacs A, Operskalski E. Using social  
18 networks to recruit an HIV vaccine preparedness cohort. *Journal of acquired immune*  
19 *deficiency syndromes (1999)* 2009;52(4):514.  
20  
21  
22 47 Young AM, Stephens DB, Khaleel HA, Havens JR. Hepatitis C vaccine clinical trials among  
23 people who use drugs: potential for participation and involvement in recruitment.  
24 *Contemporary Clinical Trials*. Elsevier; 2015 Mar 1;41:9–16.  
25  
26 48 Sackett DL. Clinician trialist rounds: 5. Cointervention bias — how to diagnose it in their  
27 trial and prevent it in yours. *Clinical Trials*. 2011; 8: 440-442.  
28  
29  
30  
31  
32  
33  
34  
35  
36  
37  
38  
39  
40  
41  
42  
43  
44  
45  
46  
47  
48  
49  
50  
51  
52  
53  
54  
55  
56  
57  
58  
59  
60

1  
2  
3  
4  
5  
6  
7  
8  
9  
10  
11  
12  
13  
14  
15  
16  
17  
18  
19  
20  
21  
22  
23  
24  
25  
26  
27  
28  
29  
30  
31  
32  
33  
34  
35  
36  
37  
38  
39  
40  
41  
42  
43  
44  
45  
46  
47  
48  
49  
50  
51  
52  
53  
54  
55  
56  
57  
58  
59  
60

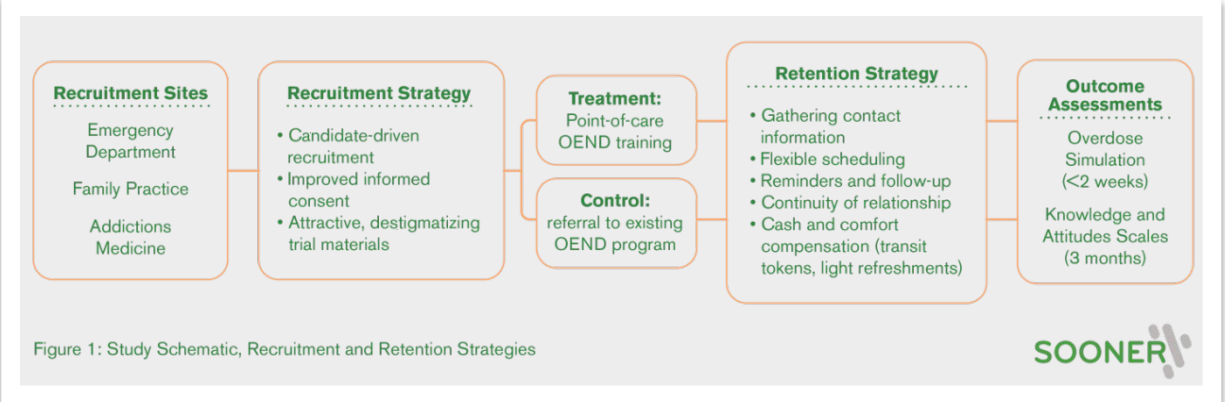

For peer review only

# BMJ Open

## Protocol for a Mixed Methods Feasibility Study for the Surviving Opioid Overdose with Naloxone Education and Resuscitation (SOONER) Randomized Control Trial

|                                 |                                                                                                                                                                                                                                                                                                                                                                                                                                                                                                                                                                                                                                                                                                                                                                                                                                                                                                                                                                                                                                                                                                                                                                                                                                                                                                                                                          |
|---------------------------------|----------------------------------------------------------------------------------------------------------------------------------------------------------------------------------------------------------------------------------------------------------------------------------------------------------------------------------------------------------------------------------------------------------------------------------------------------------------------------------------------------------------------------------------------------------------------------------------------------------------------------------------------------------------------------------------------------------------------------------------------------------------------------------------------------------------------------------------------------------------------------------------------------------------------------------------------------------------------------------------------------------------------------------------------------------------------------------------------------------------------------------------------------------------------------------------------------------------------------------------------------------------------------------------------------------------------------------------------------------|
| Journal:                        | <i>BMJ Open</i>                                                                                                                                                                                                                                                                                                                                                                                                                                                                                                                                                                                                                                                                                                                                                                                                                                                                                                                                                                                                                                                                                                                                                                                                                                                                                                                                          |
| Manuscript ID                   | bmjopen-2019-029436.R1                                                                                                                                                                                                                                                                                                                                                                                                                                                                                                                                                                                                                                                                                                                                                                                                                                                                                                                                                                                                                                                                                                                                                                                                                                                                                                                                   |
| Article Type:                   | Protocol                                                                                                                                                                                                                                                                                                                                                                                                                                                                                                                                                                                                                                                                                                                                                                                                                                                                                                                                                                                                                                                                                                                                                                                                                                                                                                                                                 |
| Date Submitted by the Author:   | 28-Jun-2019                                                                                                                                                                                                                                                                                                                                                                                                                                                                                                                                                                                                                                                                                                                                                                                                                                                                                                                                                                                                                                                                                                                                                                                                                                                                                                                                              |
| Complete List of Authors:       | Orkin, Aaron; University of Toronto, Department of Family & Community Medicine; Inner City Health Associates<br>Campbell, Douglas; St. Michael's Hospital, Allan Waters Family Simulation Centre; University of Toronto, Pediatrics<br>Handford, Curtis; St Michael's Hospital Toronto, Department of Family and Community Medicine<br>Hopkins, Shaun; Toronto Public Health<br>Klaiman, Michelle; St. Michael's Hospital, Department of Emergency Medicine<br>Leece, Pamela; Public Health Ontario<br>Parsons, Janet; St. Michael's Hospital, Applied Health Research Centre, Li Ka Shing Knowledge Institute; University of Toronto, Dept. of Physical Therapy<br>Shahin, Rita; Toronto Public Health<br>Strike, Carol; University of Toronto, Dalla Lana School of Public Health<br>Thorpe, Kevin; St. Michael's Hospital, Applied Health Research Centre<br>Sellen, Kate; OCAD University, Design for Health<br>Milos, Geoffrey; St. Michael's Hospital, SOONER Project Community Advisory Committee<br>Wright, Amy; Toronto Public Health; St. Michael's Hospital, SOONER Project Community Advisory Committee<br>Charles, Mercy; St. Michael's Hospital, Allan Waters Family Simulation Centre<br>Sniderman, Ruby; St. Michael's Hospital, Applied Health Research Centre<br>Morrison, Laurie; St. Michael's Hospital<br>SOONER Investigators, The |
| <b>Primary Subject Heading</b>: | Addiction                                                                                                                                                                                                                                                                                                                                                                                                                                                                                                                                                                                                                                                                                                                                                                                                                                                                                                                                                                                                                                                                                                                                                                                                                                                                                                                                                |
| Secondary Subject Heading:      | Emergency medicine, General practice / Family practice, Medical education and training, Public health, Qualitative research                                                                                                                                                                                                                                                                                                                                                                                                                                                                                                                                                                                                                                                                                                                                                                                                                                                                                                                                                                                                                                                                                                                                                                                                                              |
| Keywords:                       | Feasibility study, Trial Protocol, Opioid Overdose, recruitment and retention, Overdose education and naloxone distribution                                                                                                                                                                                                                                                                                                                                                                                                                                                                                                                                                                                                                                                                                                                                                                                                                                                                                                                                                                                                                                                                                                                                                                                                                              |
|                                 |                                                                                                                                                                                                                                                                                                                                                                                                                                                                                                                                                                                                                                                                                                                                                                                                                                                                                                                                                                                                                                                                                                                                                                                                                                                                                                                                                          |



1  
2  
3  
4  
5  
6  
7  
8  
9  
10  
11  
12  
13  
14  
15  
16  
17  
18  
19  
20  
21  
22  
23  
24  
25  
26  
27  
28  
29  
30  
31  
32  
33  
34  
35  
36  
37  
38  
39  
40  
41  
42  
43  
44  
45  
46  
47  
48  
49  
50  
51  
52  
53  
54  
55  
56  
57  
58  
59  
60

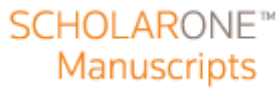

**Title:** Protocol for a Mixed Methods Feasibility Study for the Surviving Opioid Overdose with Naloxone Education and Resuscitation (SOONER) Randomized Control Trial

Running Head: SOONER Feasibility Study Protocol

Authors: Orkin AM, Campell D, Handford C, Hopkins S, Klaiman M, Leece P, Parsons J, Shahin R, Strike C, Thorpe K, Sellen K, Milos G, Wright A, Charles M, Sniderman R, Morrison L on behalf of the SOONER Investigators.

**Authorship table:**

| Name             | Postnominals  | Affiliations                                                                                                                                             |
|------------------|---------------|----------------------------------------------------------------------------------------------------------------------------------------------------------|
| Aaron M. Orkin   | MD, MSc, MPH  | Applied Health Research Centre, St. Michael's Hospital, Inner City Health Associates, Department of Family and Community Medicine, University of Toronto |
| Douglas Campbell | MD, MSc       | Allan Waters Family Simulation Centre, St. Michael's Hospital                                                                                            |
| Curtis Handford  | MD, MHSc      | Department of Family and Community Medicine, St. Michael's Hospital                                                                                      |
| Shaun Hopkins    | BSW           | Toronto Public Health                                                                                                                                    |
| Michelle Klaiman | MD            | Department of Emergency Medicine, St. Michael's Hospital                                                                                                 |
| Pamela Leece     | MD, MSc       | Public Health Ontario                                                                                                                                    |
| Janet Parsons    | BScPT MSc PhD | Applied Health Research Centre, St. Michael's Hospital, University of Toronto                                                                            |
| Rita Shahin      | MD, MHSc      | Toronto Public Health                                                                                                                                    |
| Carol Strike     | PhD, MSc      | University of Toronto, St. Michael's Hospital                                                                                                            |
| Kevin Thorpe     | MMath         | University of Toronto, Applied Health Research Centre, St. Michael's Hospital                                                                            |
| Kate Sellen      | PhD, MDes     | OCAD University                                                                                                                                          |
| Geoffrey Milos   |               | Community Advisory Group, SOONER Project, St. Michael's Hospital                                                                                         |
| Amy Wright       |               | Community Advisory Group, SOONER Project, St. Michael's Hospital                                                                                         |
| Mercy Charles    | BSc, CCRP     | Applied Health Research Centre, St. Michael's Hospital                                                                                                   |
| Ruby Sniderman   | MPH           | Applied Health Research Centre, St. Michael's Hospital                                                                                                   |
| Laurie Morrison  | MD, MSc       | Applied Health Research Centre, St. Michael's Hospital                                                                                                   |

**Corresponding author and contact information:**

Aaron Orkin t: 647-923-7551 e: [aaron.orkin@mail.utoronto.ca](mailto:aaron.orkin@mail.utoronto.ca)

**Keywords:** Feasibility study, Randomized control trial, Trial protocol, Design for health, Recruitment, Retention, Harm reduction, Opioid overdose, Overdose education, Naloxone distribution, Addiction medicine, Family medicine, Emergency medicine

**Funding Statement:** This project was funded by a project grant from the Canadian Institutes of Health Research (CIHR) grant #148817. The Canadian Centre on Substance Use and Addiction (CCSA) also contributed to project workshops and community engagement.

**Conflict of Interest Statement:**

**AO:** Evidence reviewer for ILCOR 2015, and writer for AHA/HSFC Guidelines on CPR and Resuscitation in 2015. Receives salary support from the Canadian Institutes of Health Research, the Schwartz/Reisman Emergency Medicine Institute, and the University of Toronto Department of Family and Community Medicine. AO is an evidence reviewer for the International Liaison Committee on Resuscitation and a co-author for the 2015 American Heart Association Guidelines for CPR and ECC concerning opioid overdose and 2019 American Heart Association Guidelines updates on First Aid.

**CH:** Contract with Toronto Central Local Health Integration Network as primary care clinical lead for the mid-east Toronto sub-region.

**SH:** No conflicts of interest declared

**MK:** Speaker honoraria from the Ontario Pharmacists Association continuing education programs on the topic of opioid use disorder. I do not address take home naloxone beyond mentioning that the program exists (Major >\$5,000). Advisory Committee Member, Health Quality Ontario, Quality Standard on Opioid Use Disorder, but recused from voting on standards that involved take-home naloxone.

**PL:** Advisory Committee Member, Health Quality Ontario, Quality Standard: Opioid Use Disorder; Quality Statement 6 pertains to access to naloxone and overdose education.

**LM:** contributor to the 2015 guidelines and ILCOR consensus on science where opioid management was reviewed and updated.

**DC, JP, RSh, CS, KT, KS, GM, AW, MC, RSn:** No conflicts of interest declared

## Abstract

### *Introduction:*

The Surviving Opioid Overdose with Naloxone Education and Resuscitation (SOONER) Project uses co-design and trial methods to develop and evaluate a point-of-care overdose education and naloxone distribution (OEND) tool. We plan to conduct a randomized controlled trial to assess the effectiveness of our OEND tool in comparison with existing standard of care by observing participants' performance as a responder to a simulated overdose. Recruiting and retaining people at risk of or likely to witness opioid overdose raises scientific, logistical, and bioethical challenges. A feasibility study is needed to establish the effectiveness of recruitment and retention strategies and acceptability of study procedures prior to launching the full trial.

### *Methods and Analysis:*

Strategies to enhance recruitment include candidate-driven recruitment, verbal informed consent, and attractive, destigmatizing materials. Adults at risk of or likely to witness opioid overdose will be recruited through an urban emergency department, inpatient and ambulatory addiction medicine service, and outpatient family practice settings. Participants randomized to the intervention arm will receive our OEND intervention; those in the control arm will be referred to existing OEND programs. Retention procedures include participant reminders, flexible scheduling, cash and comfort compensation, and strategies to maintain a consistent relationship between individual study staff and participants. Within two weeks following recruitment, participants will engage as a responder to a mannequin-simulated overdose, and complete overdose knowledge and attitudes questionnaires. The primary outcome is recruitment and retention feasibility, defined as the recruitment of 28 participants within 28 days of recruitment and less than 50% attrition at the overdose simulation. Staff and participant feedback will also be collected and considered.

### *Ethics & Dissemination*

The study has been reviewed by ethics boards at St. Michael's Hospital, Toronto Public Health, and the University of Toronto. Dissemination will occur through peer-reviewed publication and presentations.

### *Trial registration:*

ClinicalTrials.gov NCT03821649

## 1 Article Summary

### *Strengths and limitations of this study*

- This project's main strength is the use of a feasibility study to assess and refine a recruitment and retention strategy among people who are at risk of or likely to witness opioid overdose prior to initiating a randomized controlled trial.
- The strengths of the proposed recruitment and retentions strategy include cash and comfort compensation for participation, follow-up through multiple communications media, flexible scheduling for follow-up assessments, verbal consent processes, and attention to destigmatizing language in research processes.
- The study's central limitation is that the proposed recruitment and retention strategy may require adaptation for use in other settings.

1  
2  
3  
4  
5  
6  
7  
8  
9  
10  
11  
12  
13  
14  
15  
16  
17  
18  
19  
20  
21  
22  
23  
24  
25  
26  
27  
28  
29  
30  
31  
32  
33  
34  
35  
36  
37  
38  
39  
40  
41  
42  
43  
44  
45  
46  
47  
48  
49  
50  
51  
52  
53  
54  
55  
56  
57  
58  
59  
60

For peer review only

## 2 Background

Deaths from opioid overdose represent an important and expanding global epidemic [1]. Opioid Overdose Education and Naloxone Distribution programs (OEND) train and equip people who are likely to witness overdose to recognize these emergencies and administer essential first aid interventions including naloxone, a widely known and effective competitive opioid antagonist [2,3,4]. Policymakers and practitioners have called for expanded access to OEND programs in clinical settings or “point-of-care OEND”. Point-of-care OEND would improve access to this potentially life-saving intervention, and may have a role in emergency departments, family practice, addiction medicine and other inpatient and ambulatory care settings. Although clinicians are willing to provide OEND in principle, the complexity, time requirements for training, and current design of naloxone kits remain a barrier to widespread implementation. Effective tools are a prerequisite for widespread OEND implementation in a variety of ambulatory and inpatient care settings [5,6,7,8].

We plan to conduct a randomized trial to assess the effectiveness of a point-of-care OEND intervention in comparison to the current standard of care in an emergency department, family medicine and addictions medicine settings, by observing participants’ performance in a simulated overdose emergency.

Conducting trials among people who use drugs or who are likely to witness overdose involves scientific, logistical, socio-cultural, and bioethical challenges. These challenges contribute to the persistent under-evaluation of interventions to enhance the health of this population, and threats to study validity when retention rates are low [9]. There is also limited precedent for conducting resuscitation simulations for research participants who are patients or members of the lay public rather than health care trainees [10]. Most OEND research and program evaluations involve uncontrolled studies and convenience sampling without active follow-up, with elevated rates of attrition [11,12]. The only published simulation-based study of OEND education is an uncontrolled study among 103 people recently released from prison. The study achieved 82.5% retention (85 participants) at a 1-month follow-up simulation [10]. Before conducting a full-scale point-of-care OEND trial involving overdose simulations, a feasibility study is needed to establish the effectiveness of our planned recruitment and retention strategies and the acceptability of study procedures in local recruitment sites. A feasibility study will permit the evaluation of basic randomization and data collection procedures, and create an opportunity to reconsider study design and analysis.

### 2.1 Study Objectives

The *primary objective* of this feasibility study is to identify if an integrated participant recruitment and retention strategy can recruit approximately 28 eligible participants within 28 days of recruitment, and maintain less than 50% attrition at the study’s primary 2-week outcome assessment. This is in the context of a randomized trial on point-of-care OEND and simulated overdose resuscitation performance in urban and inner-city academic family practice, emergency department, and addiction medicine settings.

The *secondary objectives* of this study are to:

- 1
- 2
- 3
- 4 1. assess the rate of participant recruitment in each of the family practice,
- 5 emergency department, and addiction medicine sites at a single academic
- 6 health care centre;
- 7
- 8
- 9 2. compare participant retention rates in the study intervention and control arms;
- 10 and
- 11
- 12 3. to describe challenges and opportunities for improving study procedures for
- 13 participants, study staff, and site staff with respect to all study processes
- 14 including participant recruitment, randomization, implementation of the
- 15 intervention and control, retention, follow-up, outcome assessment and data
- 16 collection.
- 17
- 18
- 19
- 20
- 21
- 22

### 23 **3 Methods**

#### 24 **3.1 The SOONER Project**

25 This feasibility study is part of the larger Surviving Opioid Overdose with Naloxone  
26 Education and Resuscitation (SOONER) Project, which combines co-design, clinical trial and  
27 community engagement methods ([www.soonerproject.ca](http://www.soonerproject.ca)). The goal of the SOONER Project is  
28 to develop and evaluate an effective point-of-care OEND tool, and to reduce opioid-related  
29 stigma and inequity. The SOONER Project consists of three phases: Phase I is a service design  
30 and participatory co-design initiative, where scientists, design researchers and community  
31 members co-created a point-of-care OEND toolkit [13,14] which will be evaluated in subsequent  
32 phases. Phase II is the feasibility study presented in this protocol, and Phase III is the subsequent  
33 randomized trial that will be developed based on the results of this feasibility study.  
34  
35

#### 36 **3.2 Patient and Public Involvement**

37 Drawing on principles of community engagement and participatory research, community  
38 agencies and representatives with lived experience of opioid use and overdose are involved in all  
39 aspects of the SOONER Project's development and implementation.[15,16] A group of  
40 community representatives are also engaged as *ad hoc* members of the study's Steering  
41 Committee, to refine the study research questions and measures and assess the appropriateness of  
42 study procedures and interventions. A summary of study results will be disseminated to  
43 participants, community agencies and representatives and made available through open access  
44 publication.  
45  
46  
47

#### 48 **3.3 Feasibility Trial Design**

49 The proposed study is a mixed methods feasibility study to evaluate the recruitment and  
50 retention strategy and study logistics for a randomized trial.[17] The underlying randomized trial  
51 is a pragmatic, multi-site, 2-armed, parallel-group, best-available-care controlled, analyst- and  
52 outcome assessor-blinded, superiority trial of point-of care OEND training. The study protocol  
53 was developed as a feasibility study using the SPIRIT Statement and recommendations on  
54 standard elements for protocols for interventional trials, adapted where necessary for a feasibility  
55  
56  
57

1  
2  
3 study.[18] The protocol is registered prospectively through ClinicalTrials.gov (NCT03821649).  
4 Recruitment is anticipated to launch in January 2019.  
5

### 6 7 *3.3.a Participants*

8 Participants will be recruited through three study settings:

- 9  
10 (1) Emergency Department: the St. Michael's Hospital Emergency  
11 Department,  
12  
13 (2) Family Practice: both the St. Michael's Academic Family Health Team  
14 and St. Michael's-affiliated Inner City Family Health Team, and  
15  
16 (3) Addiction Medicine: the St. Michael's Hospital Addiction Medicine  
17 Service, including both inpatient and ambulatory services.  
18  
19  
20

21 Primary outcome assessment will occur through a follow-up visit at the St. Michael's  
22 Hospital Allan Waters Family Simulation Centre (SMH Simulation Centre). Although the  
23 three recruitment settings are all affiliated with the same hospital, the trial is termed  
24 "multi-site" because of the substantial difference between the clinical contexts in the  
25 three recruitment settings.  
26  
27  
28  
29  
30

31  
32 The three recruitment settings provide routine clinical services to people at risk of  
33 opioid overdose and likely to witness overdose, but each with widely differing clinical  
34 interactions and follow-up procedures. These sites have been selected to strike a  
35 balance between study generalizability, pragmatism, and feasibility [19]. The chosen  
36 settings will permit recruitment of study participants representing a diverse urban  
37 population, with varied access to and use of emergency services, primary care and  
38 addiction treatment services.  
39  
40  
41  
42  
43  
44

### 45 46 *3.3.b Eligibility*

47 Participants will be adults  $\geq 16$  years of age who may benefit from OEND using criteria  
48 adapted from the 2015 American Heart Association Guidelines on Cardiopulmonary  
49 Resuscitation in Special Circumstances and World Health Organization Guidelines [20,21]. See  
50 Table 1 for detailed inclusion and exclusion criteria).  
51  
52  
53  
54  
55  
56  
57



**Table 1: Study Inclusion and Exclusion Criteria****Inclusion Criteria: Participants are eligible by meeting any one or more of the following:**

1. Have a history of taking opioids at recognized 'high doses' (whether by prescription or otherwise, defined as >100mg morphine equivalent per day).
2. Live with or is in frequent contact with others who use opioids or heroin.
3. Have required emergency care for opioid overdose previously.
4. Are enrolled in opioid agonist treatment programs (or has been in the last 6 months), including methadone or buprenorphine maintenance programs, particularly at high risk periods such as induction or discharge.
5. Are being released from prison, and have a history of non-medical opioid use.
6. Are receiving prescription opioid therapy with risk factors for adverse effects, including relevant comorbidities, co-prescriptions of benzodiazepines or other sedatives, concomitant ongoing alcohol use, or high dose prescription opioid therapy.
7. Uses non-medical opioids, injects opioids, or acquires opioids from sources other than a pharmacy or healthcare setting.

**Exclusion Criteria: Participants are ineligible by meeting any one or more of the following:**

1. Have a community do not resuscitate order.
2. Have a terminal illness, end-of-life care, or illness likely to result in death within the study period.
3. Have no mode of contact or follow-up.
4. Plan to move away from Toronto during the study period.
5. Have insufficient English language skills to participate in the study.
6. Are an active or previously practicing healthcare professional or professional first responder (e.g.: firefighter, police officer, lifeguard, industrial first responder).

Sixteen was chosen as the minimum participant age to (a) recognize that opioid use is a growing concern among adolescents, (b) affirm the importance of including youth in low-risk research where this population stands to benefit, (c) recognize that other basic life support studies have been conducted in children, while (d) avoiding perceptions that the study extends to research with highly vulnerable populations if a lower minimum age were chosen. [22-,24] Since the study concerns resuscitation and first aid training, people with a "Do Not Resuscitate" order or directive are excluded because such an order may reasonably alter a participant's interest in or desire to learn resuscitative skills. For candidates who decline to participate in the study, we will retain the data collected in the recruitment questionnaire and request consent to collect demographic data to compare the characteristics of study participants and non-participants.

### 3.3.c Sample Size

Based on our budget and timelines for the proposed RCT, we determined that a minimum recruitment rate of 1 participant per day of active recruitment and a minimum retention rate of 50% are required for the underlying RCT to be logistically feasible and scientifically acceptable. For logistical and budgetary reasons, we prepared to operate 28 days of participant recruitment. Therefore, we plan to recruit approximately twenty-eight (28) participants to the feasibility study, composed of between eight and twelve (8 and 12) participants from each of emergency department, family medicine, and addictions medicine sites. Study investigators working at each of the study sites confirmed that many more than 1 eligible patient candidate present to each of the recruitment sites per day. Given that both patients and visitors to the study sites are eligible

1  
2  
3 for recruitment, we therefore conclude that a recruitment rate of 1 participant per day is a viable  
4 target.  
5

6  
7 To exclude retention rates below 50%, we computed a confidence interval for the  
8 binomial distribution based on 28 participants. With a sample of 28 enrolled participants, we  
9 will be able to estimate a retention rate of 65% with a one-sided 95% confidence interval of  
10 14.8%.

$$11 \quad 0.148 = 0.1645 \cdot \sqrt{0.65 \cdot \left(\frac{1 - 0.65}{28}\right)}$$

12  
13  
14 Therefore, if at least 19 participants are retained we will be able to assert that any retention rate  
15 below 50% falls outside a 95% confidence interval for the retention rate point estimate. In a  
16 worst-case-yet-feasible scenario, the feasibility trial would therefore require 28 days of  
17 recruitment and would observe a retention rate of 65%.  
18

### 19 20 3.3.d Allocation

21  
22 Participants will be assigned to either control or intervention group with 1:2  
23 allocation by computerized randomisation schedule. Unbalanced allocation was  
24 selected for the feasibility study to gather additional information about study processes  
25 in the intervention arm, since the control arm incorporates existing processes of care.  
26  
27  
28

29  
30 In instances where eligible and consenting participants present as a part of a  
31 single clinical encounter (for example, a patient at risk of overdose presenting to the  
32 emergency department with his/her spouse), both participants will be randomized to the  
33 same study arm to avoid overt contamination between intervention and control arms.  
34 Randomisation will be stratified by site, using permuted blocks of random sizes. Block  
35 sizes will not be disclosed to ensure concealment.  
36  
37  
38  
39  
40

### 41 42 3.3.e Interventions

43  
44 Study participants randomized to the treatment arm of the study will receive brief  
45 overdose first aid training and a naloxone kit. The intervention will involve the following:  
46

- 47 1. Abbreviated point-of-care OEND training according to the training  
48 program adapted from the Toronto Public Health Prevention Overdose  
49 in Toronto (POINT) Program [25,26]. The key aspects of this training  
50 are:  
51 a. Identify life threatening overdose.  
52 b. Activate 911 services.  
53  
54  
55  
56  
57

- c. Prepare and administer intranasal naloxone.
  - d. Perform chest compressions.
  - e. Reassess and repeat naloxone administration.
  - f. Continue chest compressions until paramedics arrive.
2. A naloxone kit containing 2 doses of Narcan© naloxone hydrochloride, each 4mg intranasal (Adapt Pharmaceuticals), and administration instructions.

Training will be provided at the three recruitment settings in the clinical environment in which the participant is receiving care (clinic room, emergency department room or hallway bed etc.). A dedicated research staff person trained in basic cardiopulmonary resuscitation, first aid and overdose education, and anti-oppression techniques will provide training and naloxone kits to the participant. Clinicians will not provide training for the participant.

If the purpose-designed point-of-care OEND toolkit from Phase I of the SOONER Project is available before or during the feasibility study, participants randomized to the intervention arm will receive the custom-designed intervention instead. This will contain all of the elements of the intervention described above, but physically designed to facilitate brief training and distribution in clinical settings.

Study participants randomized to the control arm will receive the present best available standard of care. Control group instructions will recommend that clinicians proceed with care exactly as they would outside of the trial. Dedicated research staff will provide participants randomized to the control arm with a referral to (1) the Toronto Public Health “The POINT” Program, where intranasal naloxone and associated training is provided and (2) retail pharmacies where the Ontario Ministry of Health and Long-Term Care provides OEND with intranasal devices. Both of these OEND programs are available to the general public free of charge. If clinic or hospital-based naloxone distribution programs are in effect, control arm participants may also be referred or included in those programs at the attending clinician’s discretion.

### 3.3.f Study Procedures

Study procedures are shown in detail in Table 2. Study visits will involve (1) the initial enrolment session and training for participants randomized to the intervention arm, (2) a follow-up between 3 and 14 days post-enrolment to participate in the simulated overdose event and administer the knowledge and attitudes questionnaire, and (3) a follow-up at 3 months (+/- 14

1  
2  
3 days) to repeat knowledge and attitudes questionnaires by telephone or in-person. This latter 3-  
4 month follow-up is included to allow comparison of our results and study population with other  
5 studies using a 3-month follow-up with the same questionnaires. [27,28,29]  
6  
7

8 Participants who miss a scheduled visit may reschedule their visit at a mutually  
9 convenient time. Out-of-window visits will be permitted and noted in the final report. Study staff  
10 will also collect informal feedback from personnel at all study sites throughout recruitment to  
11 describe challenges, and opportunities for quality improvement of study processes.  
12  
13  
14  
15  
16  
17  
18  
19  
20  
21  
22  
23  
24  
25  
26  
27  
28  
29  
30  
31  
32  
33  
34  
35  
36  
37  
38  
39  
40  
41  
42  
43  
44  
45  
46  
47  
48  
49  
50  
51  
52  
53  
54  
55  
56  
57  
58  
59  
60

For peer review only

**Table 2: Study Procedures Timetable**

| Assessment/Activity                              | Enrolment Visit | Outcome Simulation, Knowledge and Attitudes Questionnaire, Interview (3-14 days) | Knowledge and Attitudes Questionnaires (3 months)* |
|--------------------------------------------------|-----------------|----------------------------------------------------------------------------------|----------------------------------------------------|
| Eligibility Questionnaire                        | x               |                                                                                  |                                                    |
| Informed Consent                                 | x               |                                                                                  |                                                    |
| Demographic Data Collection                      | x               |                                                                                  |                                                    |
| Tertiary Clinical Outcome Baseline Questionnaire | x               |                                                                                  |                                                    |
| Randomisation                                    | x               |                                                                                  |                                                    |
| Intervention Training or Control Referral        | x               |                                                                                  |                                                    |
| Outcome Simulation and Assessment                |                 | x                                                                                |                                                    |
| Knowledge and Attitudes Questionnaire            | x               | x                                                                                | x                                                  |
| Follow-Up Interview                              |                 | x                                                                                |                                                    |

\*3-month Knowledge and Attitudes Questionnaire completed only by participants who (a) inject drugs, or (b) are friends or family members of people who inject drugs (see Section 3.6.c: Tertiary Clinical Outcomes).

### 3.4 Recruitment and Retention Strategies

We expect our underlying study could be affected by attrition, as many participants experience unstable housing or incarceration, overdose or other health problems, may be difficult to reach by phone, and may experience stigma associated with opioid use. The recruitment and retention strategies under investigation in this feasibility study build on existing research on incentivising and improving clinical trial participation among people who use opioids [30,31]. (See Figure 1: Study Schematic, Recruitment and Retention Strategies.)

[Figure 1 inserted approximately here]

#### 3.4.a Recruitment

*Candidate-driven recruitment:* Candidates will be identified and recruited to the study according to a uniform general procedure, with site-specific modifications according to the practice patterns and operational needs of the 3 different clinical settings. All patients will be given an ultra-brief information card asking (a) if they take opioids or have a friend or family member who uses opioids, and (b) if they would be interested in participating in a study concerning OEND training. The card will indicate that patients should notify any of the clinical staff if they answer “yes” to both of these questions. The clinician or administrative staff will then notify study personnel, who will approach the candidate to determine eligibility, obtain informed consent, randomize the participant and implement the intervention.

This “candidate-driven” recruitment procedure was designed to reduce recruitment biases and the stigma of study recruitment by informing all patients of the study and allowing people in clinical settings to self-identify as interested and potentially eligible for study enrolment. By distributing the informational card to all patients, this recruitment method reduces the effect of clinician biases and prejudices regarding which patients are at risk of opioid overdose because all patients are alerted to the study. Candidates may self-identify their potential eligibility in

1  
2  
3 circumstances where clinicians are unaware of their eligibility. By using an informational card  
4 rather than the more conventional practice of recruitment posters, patients and study candidates  
5 can be alerted to the study and discuss their interest in participating with staff discreetly, without  
6 having to point at or read a poster placed in a public area. This serves to protect confidentiality,  
7 normalize the information given to all patients, and positions patients as the initiators of the  
8 recruitment process. The candidate-driven approach is further enhanced by encouraging  
9 clinicians to discuss the study with potentially eligible patients or visitors directly.  
10  
11

12  
13 *Improved informed consent:* Lengthy written consent forms may deter study candidates from  
14 participating in research, without improving the quality of informed consent or the knowledge of  
15 participants.[32] Written signed consent may be perceived as an attempt to legalize the consent  
16 process and may itself deter participants in this study. We therefore favour oral or verbal  
17 consent for this trial.[33] A systematic review on strategies to improve informed consent  
18 processes in trials found that having a study team member spend more time talking one-on-one  
19 with trial candidates was the most effective available way of improving research participants'  
20 understanding.[34] Informed consent will be obtained through a verbal process, assisted with a  
21 visual map of study procedures and a brief script, with ample time for participants to ask  
22 questions and discuss each phase of the study.  
23  
24

25  
26 *Attractive, destigmatizing trial materials:* Study informational materials, consent forms, and  
27 consent processes have also been designed to reduce barriers to trial recruitment. Developed  
28 through the SOONER Project's collaboration with design researchers and drawing on  
29 participatory co-design methods, study handouts have been written in plain, destigmatizing and  
30 inviting language, and graphically designed to avoid stigmatizing imagery associated with opioid  
31 use and overdose.  
32

### 33 3.4.b Retention

34  
35 *Gathering contact information:* At enrolment, participants will know that they will be followed  
36 over time, and we will specify the timetable and methods that will be used to contact them. We  
37 will collect multiple points of contact based on participant preferences, including phone numbers  
38 (for phoning and text messages), email addresses, and mailing addresses. As an alternate means  
39 of contact, we will ask to collect the names of two friends, relatives, case managers, clinics,  
40 community centres, or shelters with whom participants have regular contact. Participants will be  
41 provided with multiple methods to contact study personnel, including dropping in at recruitment  
42 sites, phoning, emailing, or speaking to any of the staff associated with the study.  
43  
44

45  
46 *Flexible scheduling:* Outcome Assessment Simulations will be scheduled flexibly and outside  
47 business hours if required. We will offer to meet participants at their recruitment location and  
48 walk with them to the simulation centre if needed. The short (maximum 2-week) interval for the  
49 primary outcome evaluation will reduce attrition for our primary outcome. Research staff will  
50 schedule participants' follow-up simulation for between 4 days and 1 week after randomization.  
51 This leaves at least 1 week for rescheduling before the 2-week maximum follow-up time.  
52 Participants will be able to select a time for the simulation outcome assessment that meets their  
53 scheduling needs. Participants will also receive a study card with the simulation time and  
54 location as well as contact information of the research coordinator.  
55  
56  
57

1  
2  
3 *Reminders and follow-up:* Based on advice from community representatives on the study steering  
4 committee, we developed a communication and reminder strategy to suit the participants' diverse  
5 needs and contexts. Many members of the target population face tenuous housing and limited  
6 financial resources, but many do have cellular phones. For many, communication by letter mail  
7 will be untimely and ineffective. Limited financial resources mean that many participants may  
8 not have daytime telephone "minutes" and do not take incoming calls, preferring instead to  
9 communicate by text message. We emphasize the use of text message reminders, drawing on  
10 research demonstrating the feasibility and effectiveness of text messaging for participant  
11 retention in randomized trials.[35]  
12  
13

14  
15 Participants will be asked to choose their preferred and secondary method of contact from phone  
16 call, text message or email. Participants will be contacted by their preferred and secondary  
17 method 5, 3 and 1 day(s) before their scheduled simulation and on the morning of their  
18 simulation to confirm attendance or reschedule, with up to 3 attempts on each of the days of  
19 contact. In addition, consenting participants will receive a letter prior to the outcome assessment.  
20 Participants will be contacted one week before the 3-month assessment via their preferred  
21 method of contact. Communication scripts will be used when contacting participants and  
22 messages will not refer to details of the study or to opioid use.  
23  
24

25 *Continuity of relationships:* We will strive for consistency in research staff-participant pairing to  
26 enhance rapport and build trust, which has been shown to improve patient recruitment and  
27 retention.[30] All staff have received anti-oppression training. Wherever possible, the same  
28 SOONER staff person who conducts informed consent and recruits a study participant will serve  
29 as the point of contact for a given study participant. Study staff will welcome participants at the  
30 research institute lobby for outcome visits and accompany them to the assessment centre.  
31  
32

33 *Cash and other compensation:* Participants will receive cash per study visit: (1) \$15 after  
34 consenting to trial activities, (2) \$40 upon arrival for the simulation, and (3) \$20 upon  
35 completion of a follow up interview. Participants will be offered public transit tokens for travel  
36 to and from each study visit, snacks, and light refreshments at each study visit. The amount of  
37 remuneration proposed in our study for the time required from our participants is consistent with  
38 amounts provided in other studies with this population, and payments like those proposed here  
39 are effective to improve retention without demonstrating a coercive effect on participants nor  
40 precipitating drug use behaviours.[36,37]  
41  
42

### 43 **3.5 Feasibility Outcomes**

#### 44 **3.5.a Primary Feasibility Outcome**

45  
46 The primary outcome is the feasibility of recruitment and retention. The recruitment and  
47 retention strategy will be deemed "feasible" if approximately 28 eligible participants are  
48 recruited in 28 days of recruitment and if attrition is less than 50% for the underlying study's  
49 primary outcome assessment (overdose simulation) at 3-14 days (see Table 2). We will optimize  
50 our recruitment strategy at each site before setting "time zero" for recruitment days at each site.  
51 These outcomes will be recorded using data from the recruitment and retention log. We will  
52 compute the attrition at the Outcome Simulation and 95% binomial proportion confidence  
53 interval.  
54  
55  
56  
57

### 3.5.b *Secondary Feasibility Outcomes:*

The secondary outcomes will be:

- (1) Proportion of eligible participants (people who meet enrolment criteria) who do not consent to the study, as reported in the study log.
- (2) Proportion of participants who drop out at the outcome assessment simulation. Dropout at the outcome assessment will be defined as people who attend the outcome simulation but do not complete the simulation or withdraw from the study, as reported in the study log.

### 3.5.c *Tertiary Feasibility Outcomes:*

The perspectives of participants will be gathered through a 15-minutes individual semi-structured interview conducted at the outcome simulation visit. The interviews will be audio recorded and transcribed and the acceptability of study processes and opportunities for quality improvement will be analyzed thematically and reported by theme, and with representative quotes. The tertiary outcomes will be acceptability of recruitment, retention and outcome assessment procedures for study participants, and for staff at recruitment sites and the Simulation Centre.

The recruitment and retention strategy will undergo basic quality improvement throughout the study based on the observations of research personnel and their interactions with recruitment site staff. Research personnel will gather informal feedback from recruitment site staff and simulation centre staff regarding quality improvement of the study procedures, and difficulties encountered with respect to recruitment and retention of study participants. The insights gained will be used to make minor changes to improve the quality of study processes. Study staff will keep a quality improvement log to record the feedback received from site staff and discuss feedback at weekly team meetings.

## 3.6 *Outcomes of the Underlying RCT*

Outcome measures of the underlying RCT will be gathered but will not be analyzed or reported within the feasibility study.

### 3.6.a *Primary Outcome of the Underlying RCT:*

The primary outcome will be the proportion of resuscitation failures in a standardized high-fidelity overdose simulation conducted at the Simulation Centre. Simulations will be conducted with individual participants privately, and not in a group or with other participants observing.

The simulation itself is adapted from analogous studies and, refined to mimic a realistic and imminently fatal overdose situation [10,38,39]. The resuscitation sequence checklist is based on the 2015 American Heart Association bystander resuscitation recommendations. [20] The scenario is intended to simulate a critically life-threatening opioid overdose, where the victim will be found with no signs of life and deteriorate rapidly to opioid-related cardiac arrest. A telephone in the simulation room will be available to simulate a phone call to 911 dispatch.



1  
2  
3 Study participants will be briefed and oriented to the room using a standardized script and  
4 instructed to perform as if the simulation were real. The simulation will end with the  
5 announcement of paramedics' arrival, after approximately 10 minutes. Dedicated staff will  
6 provide a standardized semi-structured debrief for participants using a standardized framework  
7 [40]. This debrief can include direct feedback and opportunities to correct techniques, affirm  
8 positive behaviours, as well as set the stage for reflection [40,41].  
9  
10

11 Simulations will be video recorded, and performance assessments will be conducted based  
12 on the video recordings. Data collection will occur using a combination of a simple checklist and  
13 resuscitation simulator manikin, arranged to create a high-fidelity simulated overdose situation  
14 similar to the simulation described by Kobayashi et al [10]. Assignment of the global assessment  
15 score will be based on a consensus of two assessors. Any discrepancy in the assessments of the  
16 simulation evaluators will be adjudicated by a lead investigator.  
17  
18

### 19 *3.6.b Secondary Outcome of the Underlying RCT*

20

21 The secondary clinical outcome will be performance on eight skills: (1) Recognize the  
22 emergency, (2) Position the victim, (3) Activate emergency medical services, (4) Administer  
23 naloxone (prepare device, administer correctly), (5) Hand placement, (6) Chest compressions  
24 (rate and depth), (7) Continue compressions until end of simulation, and (8) Order of operations  
25 and organization.  
26  
27

28 These eight indicators were adapted from previous CPR and first response training  
29 intervention studies, and include both objective measures recorded by the resuscitation manikin  
30 and subjective measures assessed by the simulation assessor.[38,39] Assessors will rate each  
31 skill as satisfactory or unsatisfactory. Data collection will occur using a validated basic life  
32 support checklist and resuscitation manikin data, modified for OEND.[42] Non-indicated  
33 resuscitative actions will also be documented. These include rescue breathing, incorrect  
34 naloxone administration, or any other medication administration. For rescue breathing, we will  
35 collect the ventilation data automatically recorded by the resuscitation manikin.  
36  
37  
38

### 39 *3.6.c Tertiary Outcome of the Underlying RCT:*

40

41 An interviewer-administered questionnaire will be used at enrolment, at the  
42 simulation and at 3 months to measure tertiary clinical outcomes related to participants'  
43 knowledge about overdose, confidence and willingness to intervene in overdose,  
44 reported responses to witnessing overdose events, self-assessed barriers to responding  
45 to an overdose, and self-reported drug overdose risk behaviours. The questionnaire will  
46 be scripted to reduce variability between interviewers.  
47  
48  
49  
50  
51

52 The questionnaires contain both close-ended questions and open-ended questions,  
53 developed for the Toronto Public Health OEND program evaluation [25]. Questionnaire items  
54 were developed using data points from other OEND programs and from the validated Opioid  
55  
56  
57

1  
2  
3 Overdose Knowledge and Attitudes Scales (OOKS and OOAS) [27]. Although the OOKS and  
4 OOAS are validated tools, they have been validated only among people who inject drugs and the  
5 family members of people who inject drugs, especially heroin [28,29]. These studies have  
6 assessed the effectiveness of OEND programs using comparisons of OOKS and OOAS scores  
7 before and 3 months after training. Therefore, to permit comparison with these studies,  
8 participants who inject drugs or who are friends or family members of people who inject drugs  
9 will be asked to return to complete the OOKS and OOAS at 3 months after enrolment.  
10  
11

### 12 **3.7 Data Sharing**

14 As stipulated in the study informed consent documents, data will not be shared directly  
15 with researchers outside the study investigator group. Investigators wishing to undertake further  
16 analyses of quantitative study data should contact the corresponding author.  
17  
18

## 19 **4 Discussion**

21 The proposed study will test study procedures and the feasibility of an integrated  
22 recruitment and retention strategy for people likely to witness opioid overdose in the context of  
23 an OEND trial using a simulated opioid overdose event for outcome assessment.  
24  
25

26 Published strategies to improve participant retention include the involvement of  
27 community members in study design and implementation, cash and comfort compensation for  
28 study participation, regular follow-up through multiple communications media, building trust  
29 and improving communication around trial methods, and flexible hours and scheduling for  
30 follow-up assessments [31,35,30,37]. Attention to patient-centered, destigmatizing and  
31 participatory language in research processes may also enhance participant recruitment and  
32 retention [43]. The integration of these elements is the primary strength of our proposed  
33 recruitment and retention strategy. Additional strengths include our use of participatory co-  
34 design methods for the development of study interventions and materials, and ongoing  
35 engagement with people with lived experience of opioid use for study implementation.  
36 Recruitment and retention for this study might be further strengthened by engaging peer workers  
37 directly in participant recruitment and retention. Although this approach has been successful in  
38 other studies with similar populations, in the context of a study designed to test the effectiveness  
39 of OEND in a broad variety of clinical settings, we felt that the introduction of peer workers  
40 would act as a cointervention and reduce the scalability of the intervention.[19,44,45,46].  
41  
42  
43

44 Since the study is occurring in an urban population and a randomized trial, our results  
45 may not be generalizable to other settings, clinical contexts or study designs. However, if the  
46 study demonstrates feasibility, this recruitment and retention strategy will be ready for  
47 deployment in a full-scale trial, and potentially for adaptation to other settings.  
48  
49

## 50 **5 Ethics and Dissemination**

52 The study has been reviewed by ethics boards at St. Michael's Hospital and the Toronto  
53 Academic Health Sciences Network, Toronto Public Health, and the University of Toronto.  
54 Protocol amendments will also be managed through these research ethics boards. Results will be  
55 disseminated through peer-reviewed publication and scholarly presentations, and through the  
56  
57

SOONER Project's network of community agencies and people with lived experience of opioid use and overdose. Participants and study recruitment sites will be sent a lay summary of study results.

## 6 Author Statement

In addition to the authors named, the SOONER Investigators also includes contributors Leigh Chapman, Nick Goso, Richard Hunt, Peter Jüni, Vicky Stergiopoulos, Suzanne Turner, and Daniel Werb. All authors and contributors conceptualized the study and acquired funding (AO, DC, CH, SH, MK, PL, JP, RSh, CS, KT, KS, GM, AW, MC, RSn, LM, LC, NG, RH, PJ, VS, ST and DW). RS, MC and AO undertook project administration, and LM and CS supervised the project. All authors contributed to the design and methodology of the study. AO prepared the first draft of the manuscript. All authors contributed to revising and approving the final manuscript.

## 7 Acknowledgements

The authors thank Rekha Thomas and Kristine Norris for their role in finalizing this protocol and manuscript preparation and submission. We thank Audra Stitt and Kate Byrne for their contribution to project management. We also acknowledge the Alan Waters Simulation Centre and staff and other staff at Rescu and the Applied Health Research Centre for assisting with this project. We acknowledge Laerdal Ltd. for donating a resuscitation mannequin, Adapt Pharma for donating naloxone delivery devices and placebo devices, and Made Good for donating snacks for participants to the proposed study. None of these companies provided a financial contribution or had any access to or role in the development or conduct of the proposed study. We thank the many community agencies, community members, and people with lived experience of opioid overdose who have contributed to various stages of the SOONER Project.

## 9 References

- 1 United Nations Office on Drugs and Crime, World Health Organization. Discussion paper UNODC/WHO 2013: Opioid overdose: preventing and reducing opioid overdose mortality. 2013; Available at: <http://www.unodc.org/docs/treatment/overdose.pdf>. Accessed 04/23, 2014. Archived by WebCite© at <http://www.webcitation.org/6U3qbjl2E>
- 2 Clark AK, Wilder CM, Winstanley EL. A systematic review of community opioid overdose prevention and naloxone distribution programs. *J Addict Med*. 2014;8:153-163.
- 3 European Monitoring Centre for Drugs and Drug Addiction (2015), Preventing fatal overdoses: a systematic review of the effectiveness of take-home naloxone, *EMCDDA Papers*, Publications Office of the European Union, Luxembourg.
- 4 Doyon S, Aks SE, Schaeffer S. Expanding access to naloxone in the United States. *Clin Toxicol (Phila)*. 2014:1-4.

- 1  
2  
3  
4 5 Beletsky L, Ruthazer R, Macalino GE, Rich JD, Tan L, Burris S. Physicians' knowledge of and  
5 willingness to prescribe naloxone to reverse accidental opiate overdose: challenges and  
6 opportunities. *Journal of Urban Health*. 2007;84:126-136.  
7  
8  
9 6 Coffin PO, Fuller C, Vadnai L, Blaney S, Galea S, Vlahov D. Preliminary evidence of health  
10 care provider support for naloxone prescription as overdose fatality prevention strategy in  
11 New York City. *Journal of Urban Health*. 2003;80:288-290.  
12  
13 7 Lacroix L, Thurgur L, Orkin AM, Perry JJ, Stiell IG. Emergency physicians' attitudes and  
14 perceived barriers to the implementation of take-home naloxone programs in Canadian  
15 emergency departments. *CJEM* 2017, Sep 18:1-7.  
16  
17  
18 8 Leece P, Orkin A, Shahin R, Steele LS. Can naloxone prescription and overdose training for  
19 opioid users work in family practice? Perspectives of family physicians. *Canadian Family*  
20 *Physician*. 2015;61(6):538-43.  
21  
22  
23 9 Meyers K, Webb A, Frantz J, Randall M. What does it take to retain substance-abusing  
24 adolescents in research protocols? Delineation of effort required, strategies undertaken,  
25 costs incurred, and 6-month post-treatment differences by retention difficulty. *Drug*  
26 *Alcohol Depend* 2003, Jan 24;69(1):73-85.  
27  
28  
29 10 Kobayashi L, Green TC, Bowman SE, Ray MC, McKenzie MS, Rich JD. Patient simulation  
30 for assessment of layperson management of opioid overdose with intranasal naloxone in a  
31 recently released prisoner cohort. *Simulation in Healthcare* 2017, Jan 9; Publish Ahead of  
32 Print.  
33  
34  
35 11 Clark AK, Wilder CM, Winstanley EL. A systematic review of community opioid overdose  
36 prevention and naloxone distribution programs. *J Addict Med* 2014;8(3):153-63.  
37  
38  
39 12 Orkin AM, Bingham K, Buick JE, Klaiman M, Leece P, Kouyoumdjian FG. "Quality  
40 Assessment Errors and Study Misclassification Threaten Systematic Review Validity:  
41 Community Opioid Overdose Prevention and Naloxone Distribution Programs Review:  
42 Re: Clark AK, Wilder CM, Winstanley EL. A systematic review of community opioid  
43 overdose prevention and naloxone distribution programs." *J Addict Med* 2014 May-  
44 June;8(3): 153-163. *J Addict Med*. 2015 Dec;9(6):502-3.  
45  
46  
47 13 Friere K, Sangiorgi D. Service design and healthcare innovation: From consumption to co-  
48 production and co-creation. In *Service Design and Service Innovation conference 2010*  
49 (pp. 39-50). Linköping Electronic Conference Proceedings.  
50  
51  
52 14 Donetto S, Pierri P, Tsianakas V, Robert G. Experience-based Co-design and Healthcare  
53 Improvement: Realizing Participatory Design in the Public Sector. *The Design Journal*.  
54 Routledge; 2015 May 7;18(2):227-48.  
55  
56 15 Shippee ND, Domecq Garces JP, Prutsky Lopez GJ, Wang Z, Elraiyah TA, Nabhan M, Brito  
57 JP, Boehmer K, Hasan R, Firwana B, Erwin PJ. Patient and service user engagement in

- 1  
2  
3  
4 research: a systematic review and synthesized framework. *Health Expectations*. 2015 Oct  
5 1;18(5):1151-66.  
6  
7  
8 16 Wallerstein NB, Duran B. Using Community-Based Participatory Research to Address Health  
9 Disparities. *Health Promotion Practice*. 2nd ed. Sage Publications: Thousand Oaks, CA;  
10 2016 Jun 30;7(3):312–23.  
11  
12 17 Eldridge SM, Lancaster GA, Campbell MJ, Thabane L, Hopewell S, Coleman CL, Bond CM.  
13 Defining feasibility and pilot studies in preparation for randomised controlled trials:  
14 Development of a conceptual framework. *PLoS One* 2016;11(3):e0150205.  
15  
16  
17 18 Chan A-W, Tetzlaff JM, Altman DG, Laupacis A, Gøtzsche PC, Krleža-Jerić K, et al. SPIRIT  
18 2013 statement: defining standard protocol items for clinical trials. *Annals of internal  
19 medicine*. 2013;158(3):200-7.  
20  
21  
22 19 Thorpe KE, Zwarenstein M, Oxman AD, et al. A pragmatic—explanatory continuum  
23 indicatosummary (PRECIS): a tool to help trial designers. *J Clin Epidemiol*.  
24 2009;62:464-475.  
25  
26  
27 20 Lavonas EJ, Drennan IR, Gabrielli A, Heffner AC, Hoyte CO, Orkin AM, et al. Part 10:  
28 Special Circumstances of Resuscitation: 2015 American Heart Association Guidelines  
29 Update for Cardiopulmonary Resuscitation and Emergency Cardiovascular Care.  
30 *Circulation*. United States; 2015 Nov 11;132(18 Suppl 2):S501–18.  
31  
32  
33  
34 21 World Health Organization. *Community management of opioid overdose*. 2014. Available at:  
35 [https://apps.who.int/iris/bitstream/handle/10665/137462/9789241548816\\_eng.pdf](https://apps.who.int/iris/bitstream/handle/10665/137462/9789241548816_eng.pdf).  
36 Accessed 19 July 2019. Archived by WebCite© at  
37 <http://www.webcitation.org/6U3qfxOMZ>.  
38  
39  
40 22 Madadi P, Hildebrandt D, Lauwers AE, Koren G. Characteristics of opioid-users whose death  
41 was related to opioid-toxicity: a population-based study in Ontario, Canada. *PLoS One*.  
42 2013;8:e60600.  
43  
44  
45 23 Canadian Institutes of Health Research, Natural Sciences and Engineering Research Council  
46 of Canada and Social Sciences and Humanities Research Council of Canada. *Tri-Council  
47 Policy Statement: Ethical Conduct for Research Involving Humans*, December 2010.  
48 Available: [www.pre.ethics.gc.ca](http://www.pre.ethics.gc.ca). Accessed 1 December 2014.  
49  
50  
51 24 Hurst B, Buick J, Cote J, Kirsh JA, Dainty KN, Morrison LJ, Yu M, Cheskes S. CPR  
52 Anytime Any School: a randomized trial of strategies to teach CPR and use of AED to  
53 high school students. *Can J Emerg Med*. 2012;14:S1  
54  
55  
56  
57  
58  
59  
60

- 1  
2  
3  
4 25 Leece PN, Hopkins S, Marshall C, Orkin A, Gassanov MA, Shahin RM. Development and  
5 implementation of an opioid overdose prevention and response program in Toronto,  
6 Ontario. *Can J Public Health*. 2013;104:e200-e204.  
7  
8  
9 26 Leece P, Marshall C, Millson P. Process evaluation of the prevent overdose in Toronto  
10 (POINT) program. *Canadian Journal of Public Health* 2016;107(3):224.  
11  
12 27 Williams AV, Strang J, Marsden J. Development of Opioid Overdose Knowledge (OOKS)  
13 and Attitudes (OOAS) Scales for take-home naloxone training evaluation. *Drug Alcohol*  
14 *Depend*. 2013;132:383-386.  
15  
16  
17 28 Williams AV, Marsden J, Strang J. Training family members to manage heroin overdose and  
18 administer naloxone: Randomized trial of effects on knowledge and attitudes. *Addiction*  
19 2014, Feb;109(2):250-9.  
20  
21  
22 29 Lott DC, Rhodes J. Opioid overdose and naloxone education in a substance use disorder  
23 treatment program. *Am J Addict* 2016, Apr;25(3):221-6.  
24  
25  
26 30 Neale J, Tompkins CNE, McDonald R, Strang J. Improving recruitment to pharmacological  
27 trials for illicit opioid use: Findings from a qualitative focus group study. *Addiction*. 2018  
28 Jan 22.  
29  
30  
31 31 Scott CK. A replicable model for achieving over 90% follow-up rates in longitudinal studies  
32 of substance abusers. *Drug Alcohol Depend* 2004, Apr;74(1):21-36.  
33  
34  
35 32 Beardsley E, Jefford M, Mileshekin L. Longer Consent Forms for Clinical Trials Compromise  
36 Patient Understanding: So Why Are They Lengthening? *Journal of Clinical Oncology*.  
37 American Society of Clinical Oncology; 2016 Sep 21;25(9):e13-4.  
38  
39  
40 33 Health Canada. Tri-Council Policy Statement 2, Chapter 3: The Consent Process. Online:  
41 [http://www.pre.ethics.gc.ca/eng/policy-politique/initiatives/tcps2-eptc2/chapter3-](http://www.pre.ethics.gc.ca/eng/policy-politique/initiatives/tcps2-eptc2/chapter3-chapitre3/#toc03-1d)  
42 [chapitre3/#toc03-1d](http://www.pre.ethics.gc.ca/eng/policy-politique/initiatives/tcps2-eptc2/chapter3-chapitre3/#toc03-1d). Accessed 17 February 2018.  
43  
44  
45 34 Flory J, Emanuel E. Interventions to Improve Research Participants' Understanding in  
46 Informed Consent for Research: A Systematic Review. *JAMA*. American Medical  
47 Association; 2004 Oct 6;292(13):1593-601.  
48  
49  
50 35 Varner C, McLeod S, Nahiddi N, Borgundvaag B. Text messaging research participants as a  
51 follow-up strategy to decrease emergency department study attrition. *Canadian journal of*  
52 *emergency medicine*. 2017:1-6.  
53  
54  
55 36 Festinger DS, Marlowe DB, Dugosh KL, Croft JR, Arabia PL. Higher magnitude cash  
56 payments improve research follow-up rates without increasing drug use or perceived  
57 coercion. *Drug and alcohol dependence*. 2008;96(1):128-35.  
58  
59  
60

- 1  
2  
3  
4 37 Festinger DS, Marlowe DB, Croft JR, Dugosh KL, Mastro NK, Lee PA, et al. Do research  
5 payments precipitate drug use or coerce participation? Drug and alcohol dependence.  
6 2005;78(3):275-81.  
7
- 8 38 Lynch B, Einspruch EL, Nichol G, Becker LB, Aufderheide TP, Idris A. Effectiveness of a  
9 30-min CPR self instruction program for lay responders: a controlled randomized study.  
10 *Resuscitation*. 2005 Oct;67(1):31-43.  
11
- 12 39 Neset A, Birkenes TS, Furunes T, Myklebust H, Mykletun RJ, Ødegaard S, et al. A  
13 randomized trial on elderly laypersons' CPR performance in a realistic cardiac arrest  
14 simulation. *Acta Anaesthesiol Scand* 2012 Jan; 56(1):124-131.  
15
- 16 40 Eppich W, Cheng A. Promoting excellence and reflective learning in simulation (PEARLS):  
17 Development and rationale for a blended approach to health care simulation debriefing.  
18 *Simulation in Healthcare* 2015, Apr;10(2):106.  
19
- 20 41 Dreifuerst, KT. The Essentials of Debriefing in Simulation Learning... *Nurs Edu Perspec*  
21 30.2 (2009): 109-114.  
22
- 23 42 Whitfield RH *etal*. Reliability of the Cardiff Test... *Resuscitation*. 2003 Dec;59(3):291-314.  
24
- 25 43 van Boekel LC, Brouwers EP, van Weeghel J, Garretsen HF. Stigma among health  
26 professionals towards patients with substance use disorders and its consequences for  
27 healthcare delivery: Systematic review. *Drug Alcohol Depend* 2013, Jul 1;131(1-2):23-  
28 35.  
29
- 30 44 Valente TW, Zogg JB, Christensen S, Richardson J, Kovacs A, Operskalski E. Using social  
31 networks to recruit an HIV vaccine preparedness cohort. *Journal of acquired immune*  
32 *deficiency syndromes (1999)* 2009;52(4):514.  
33
- 34 45 Young AM, Stephens DB, Khaleel HA, Havens JR. Hepatitis C vaccine clinical trials among  
35 people who use drugs: potential for participation and involvement in recruitment.  
36 *Contemporary Clinical Trials*. Elsevier; 2015 Mar 1;41:9–16.  
37
- 38 46 Sackett DL. Clinician trialist rounds: 5. Cointervention bias — how to diagnose it in their  
39 trial and prevent it in yours. *Clinical Trials*. 2011; 8: 440-442.  
40  
41  
42  
43  
44  
45  
46  
47  
48  
49  
50  
51  
52  
53  
54  
55  
56  
57

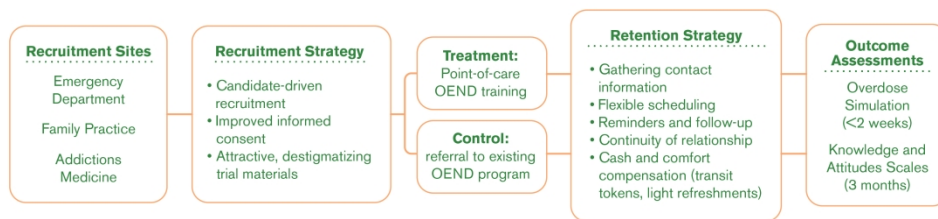

Figure 1: Study Schematic, Recruitment and Retention Strategies

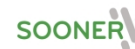



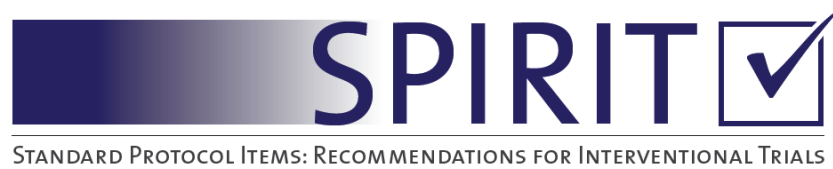

STANDARD PROTOCOL ITEMS: RECOMMENDATIONS FOR INTERVENTIONAL TRIALS

SPIRIT 2013 Checklist: Recommended items to address in a clinical trial protocol and related documents\*

| Section/item                      | Item No | Description                                                                                                                                                                                                                                                                              | Page Number on which item is reported |
|-----------------------------------|---------|------------------------------------------------------------------------------------------------------------------------------------------------------------------------------------------------------------------------------------------------------------------------------------------|---------------------------------------|
| <b>Administrative information</b> |         |                                                                                                                                                                                                                                                                                          |                                       |
| Title                             | 1       | Descriptive title identifying the study design, population, interventions, and, if applicable, trial acronym                                                                                                                                                                             | 1                                     |
| Trial registration                | 2a      | Trial identifier and registry name. If not yet registered, name of intended registry                                                                                                                                                                                                     | 16                                    |
|                                   | 2b      | All items from the World Health Organization Trial Registration Data Set                                                                                                                                                                                                                 | N/A to manuscript                     |
| Protocol version                  | 3       | Date and version identifier                                                                                                                                                                                                                                                              | N/A to manuscript                     |
| Funding                           | 4       | Sources and types of financial, material, and other support                                                                                                                                                                                                                              | 1, 11                                 |
| Roles and responsibilities        | 5a      | Names, affiliations, and roles of protocol contributors                                                                                                                                                                                                                                  | 1, 16                                 |
|                                   | 5b      | Name and contact information for the trial sponsor                                                                                                                                                                                                                                       | 1                                     |
|                                   | 5c      | Role of study sponsor and funders, if any, in study design; collection, management, analysis, and interpretation of data; writing of the report; and the decision to submit the report for publication, including whether they will have ultimate authority over any of these activities | 1, 16                                 |
|                                   | 5d      | Composition, roles, and responsibilities of the coordinating centre, steering committee, endpoint adjudication committee, data management team, and other individuals or groups overseeing the trial, if applicable (see Item 21a for data monitoring committee)                         | N/A                                   |
| <b>Introduction</b>               |         |                                                                                                                                                                                                                                                                                          |                                       |

|                                                           |     |                                                                                                                                                                                                                                                                                                                                                                                |        |
|-----------------------------------------------------------|-----|--------------------------------------------------------------------------------------------------------------------------------------------------------------------------------------------------------------------------------------------------------------------------------------------------------------------------------------------------------------------------------|--------|
| Background and rationale                                  | 6a  | Description of research question and justification for undertaking the trial, including summary of relevant studies (published and unpublished) examining benefits and harms for each intervention                                                                                                                                                                             | 5      |
|                                                           | 6b  | Explanation for choice of comparators                                                                                                                                                                                                                                                                                                                                          | 1      |
| Objectives                                                | 7   | Specific objectives or hypotheses                                                                                                                                                                                                                                                                                                                                              | 5      |
| Trial design                                              | 8   | Description of trial design including type of trial (eg, <del>parallel</del> parallel group, crossover, factorial, single group), allocation ratio, and framework (eg, superiority, equivalence, noninferiority, exploratory)                                                                                                                                                  |        |
| <b>Methods: Participants, interventions, and outcomes</b> |     |                                                                                                                                                                                                                                                                                                                                                                                |        |
| Study setting                                             | 9   | Description of study settings (eg, community clinic, academic hospital) and list of countries where data will be collected. Reference to where list of study sites can be obtained                                                                                                                                                                                             | 6      |
| Eligibility criteria                                      | 10  | Inclusion and exclusion criteria for participants. If applicable, eligibility criteria for study centres and individuals who will perform the interventions (eg, surgeons, psychotherapists)                                                                                                                                                                                   | 1      |
| Interventions                                             | 11a | Interventions for each group with sufficient detail to allow replication, including how and when they will be administered                                                                                                                                                                                                                                                     | JEF    |
|                                                           | 11b | Criteria for discontinuing or modifying allocated interventions for a given trial participant (eg, drug dose change in response to harms, participant request, or improving/worsening disease)                                                                                                                                                                                 | NA     |
|                                                           | 11c | Strategies to improve adherence to intervention protocols, and any procedures for monitoring adherence (eg, drug tablet return, laboratory tests)                                                                                                                                                                                                                              | 9, FFH |
|                                                           | 11d | Relevant concomitant care and interventions that are permitted or prohibited during the trial                                                                                                                                                                                                                                                                                  | F      |
| Outcomes                                                  | 12  | Primary, secondary, and other outcomes, including the specific measurement variable (eg, systolic blood pressure), analysis metric (eg, change from baseline, final value, time to event), method of aggregation (eg, median, proportion), and time point for each outcome. Explanation of the clinical relevance of chosen efficacy and harm outcomes is strongly recommended | 13     |

|                                                                     |     |                                                                                                                                                                                                                                                                                                                                                          |                                           |
|---------------------------------------------------------------------|-----|----------------------------------------------------------------------------------------------------------------------------------------------------------------------------------------------------------------------------------------------------------------------------------------------------------------------------------------------------------|-------------------------------------------|
| Participant timeline                                                | 13  | Time schedule of enrolment, interventions (including any run-ins and washouts), assessments, and visits for participants. A schematic diagram is highly recommended (see Figure)                                                                                                                                                                         | 9,10                                      |
| Sample size                                                         | 14  | Estimated number of participants needed to achieve study objectives and how it was determined, including clinical and statistical assumptions supporting any sample size calculations                                                                                                                                                                    | 7-8                                       |
| Recruitment                                                         | 15  | Strategies for achieving adequate participant enrolment to reach target sample size                                                                                                                                                                                                                                                                      | 10-12                                     |
| <b>Methods: Assignment of interventions (for controlled trials)</b> |     |                                                                                                                                                                                                                                                                                                                                                          |                                           |
| Allocation:                                                         |     |                                                                                                                                                                                                                                                                                                                                                          |                                           |
| Sequence generation                                                 | 16a | Method of generating the allocation sequence (eg, computer-generated random numbers), and list of any factors for stratification. To reduce predictability of a random sequence, details of any planned restriction (eg, blocking) should be provided in a separate document that is unavailable to those who enrol participants or assign interventions | J                                         |
| Allocation concealment mechanism                                    | 16b | Mechanism of implementing the allocation sequence (eg, central telephone; sequentially numbered, opaque, sealed envelopes), describing any steps to conceal the sequence until interventions are assigned                                                                                                                                                | J                                         |
| Implementation                                                      | 16c | Who will generate the allocation sequence, who will enrol participants, and who will assign participants to interventions                                                                                                                                                                                                                                | J, F, (some aspects N/A)                  |
| Blinding (masking)                                                  | 17a | Who will be blinded after assignment to interventions (eg, trial participants, care providers, outcome assessors, data analysts), and how                                                                                                                                                                                                                | Ë (some aspects N/A to feasibility study) |
|                                                                     | 17b | If blinded, circumstances under which unblinding is permissible, and procedure for revealing a participant's allocated intervention during the trial                                                                                                                                                                                                     | N/A                                       |
| <b>Methods: Data collection, management, and analysis</b>           |     |                                                                                                                                                                                                                                                                                                                                                          |                                           |

|                            |     |                                                                                                                                                                                                                                                                                                                                                                                                              |                                                  |
|----------------------------|-----|--------------------------------------------------------------------------------------------------------------------------------------------------------------------------------------------------------------------------------------------------------------------------------------------------------------------------------------------------------------------------------------------------------------|--------------------------------------------------|
| Data collection methods    | 18a | Plans for assessment and collection of outcome, baseline, and other trial data, including any related processes to promote data quality (eg, duplicate measurements, training of assessors) and a description of study instruments (eg, questionnaires, laboratory tests) along with their reliability and validity, if known. Reference to where data collection forms can be found, if not in the protocol | 13E-I<br>(some aspects N/A to feasibility study) |
|                            | 18b | Plans to promote participant retention and complete follow-up, including list of any outcome data to be collected for participants who discontinue or deviate from intervention protocols                                                                                                                                                                                                                    | 1G-1H                                            |
| Data management            | 19  | Plans for data entry, coding, security, and storage, including any related processes to promote data quality (eg, double data entry; range checks for data values). Reference to where details of data management procedures can be found, if not in the protocol                                                                                                                                            | N/A                                              |
| Statistical methods        | 20a | Statistical methods for analysing primary and secondary outcomes. Reference to where other details of the statistical analysis plan can be found, if not in the protocol                                                                                                                                                                                                                                     | 13E-I                                            |
|                            | 20b | Methods for any additional analyses (eg, subgroup and adjusted analyses)                                                                                                                                                                                                                                                                                                                                     | N/A                                              |
|                            | 20c | Definition of analysis population relating to protocol non-adherence (eg, as randomised analysis), and any statistical methods to handle missing data (eg, multiple imputation)                                                                                                                                                                                                                              | N/A<br>(feasibility study)                       |
| <b>Methods: Monitoring</b> |     |                                                                                                                                                                                                                                                                                                                                                                                                              |                                                  |
| Data monitoring            | 21a | Composition of data monitoring committee (DMC); summary of its role and reporting structure; statement of whether it is independent from the sponsor and competing interests; and reference to where further details about its charter can be found, if not in the protocol. Alternatively, an explanation of why a DMC is not needed                                                                        | N/A to feasibility study                         |
|                            | 21b | Description of any interim analyses and stopping guidelines, including who will have access to these interim results and make the final decision to terminate the trial                                                                                                                                                                                                                                      | N/A to feasibility study                         |

|                                 |     |                                                                                                                                                                                                                                                                                     |                                            |
|---------------------------------|-----|-------------------------------------------------------------------------------------------------------------------------------------------------------------------------------------------------------------------------------------------------------------------------------------|--------------------------------------------|
| Harms                           | 22  | Plans for collecting, assessing, reporting, and managing solicited and spontaneously reported adverse events and other unintended effects of trial interventions or trial conduct                                                                                                   | N/A to manuscript                          |
| Auditing                        | 23  | Frequency and procedures for auditing trial conduct, if any, and whether the process will be independent from investigators and the sponsor                                                                                                                                         | N/A to feasibility study                   |
| <b>Ethics and dissemination</b> |     |                                                                                                                                                                                                                                                                                     |                                            |
| Research ethics approval        | 24  | Plans for seeking research ethics committee/institutional review board (REC/IRB) approval                                                                                                                                                                                           | F6                                         |
| Protocol amendments             | 25  | Plans for communicating important protocol modifications (eg, changes to eligibility criteria, outcomes, analyses) to relevant parties (eg, investigators, REC/IRBs, trial participants, trial registries, journals, regulators)                                                    | F1                                         |
| Consent or assent               | 26a | Who will obtain informed consent or assent from potential trial participants or authorised surrogates, and how (see Item 32)                                                                                                                                                        | 1G                                         |
|                                 | 26b | Additional consent provisions for collection and use of participant data and biological specimens in ancillary studies, if applicable                                                                                                                                               | N/A                                        |
| Confidentiality                 | 27  | How personal information about potential and enrolled participants will be collected, shared, and maintained in order to protect confidentiality before, during, and after the trial                                                                                                | 16 (some aspects N/A to feasibility study) |
| Declaration of interests        | 28  | Financial and other competing interests for principal investigators for the overall trial and each study site                                                                                                                                                                       | 1-2                                        |
| Access to data                  | 29  | Statement of who will have access to the final trial dataset, and disclosure of contractual agreements that limit such access for investigators                                                                                                                                     | 16                                         |
| Ancillary and post-trial care   | 30  | Provisions, if any, for ancillary and post-trial care, and for compensation to those who suffer harm from trial participation                                                                                                                                                       | N/A                                        |
| Dissemination policy            | 31a | Plans for investigators and sponsor to communicate trial results to participants, healthcare professionals, the public, and other relevant groups (eg, via publication, reporting in results databases, or other data sharing arrangements), including any publication restrictions | 6,16                                       |

|                            |     |                                                                                                                                                                                                |                                    |
|----------------------------|-----|------------------------------------------------------------------------------------------------------------------------------------------------------------------------------------------------|------------------------------------|
|                            | 31b | Authorship eligibility guidelines and any intended use of professional writers                                                                                                                 | N/A                                |
|                            | 31c | Plans, if any, for granting public access to the full protocol, participant-level dataset, and statistical code                                                                                | 16                                 |
| <b>Appendices</b>          |     |                                                                                                                                                                                                |                                    |
| Informed consent materials | 32  | Model consent form and other related documentation given to participants and authorised surrogates                                                                                             | N/A for feasibility study protocol |
| Biological specimens       | 33  | Plans for collection, laboratory evaluation, and storage of biological specimens for genetic or molecular analysis in the current trial and for future use in ancillary studies, if applicable | N/A                                |

\*It is strongly recommended that this checklist be read in conjunction with the SPIRIT 2013 Explanation & Elaboration for important clarification on the items. Amendments to the protocol should be tracked and dated. The SPIRIT checklist is copyrighted by the SPIRIT Group under the Creative Commons "[Attribution-NonCommercial-NoDerivs 3.0 Unported](https://creativecommons.org/licenses/by-nc-nd/3.0/)" license.
